# Supplementary material
Source: MDPI journal article supplement (https://www.mdpi.com/2075-163X/12/10/1207)
Supplement: s1 [file s1]

## **Supporting Information**

### **Prediction on adsorption behaviors of radionuclides onto bentonites by using a machine learning method**

Do-Hyeon Kim and Jun-Yeop Lee\*

School of Mechanical Engineering, Pusan National University  
2, Busandaehak-ro 63beon-gil, Geumjeong-gu, Busan 46241, Korea

\*jylee@pusan.ac.kr

**Table S1.** Input variable database for the random forest model calculation. The data are taken from the JAEA-SDB [1], otherwise stated.

| No. | Element | Redox <sup>a)</sup> | IR <sup>b)</sup> (Å) [2] | EN <sup>c)</sup> [3] | CEC <sup>d)</sup> (meq/100 g) | SA <sup>e)</sup> (m <sup>2</sup> /g) | LS <sup>f)</sup> (mL/g) | Ionic S <sup>g)</sup> (mol/L) | pH   | C <sub>0</sub> <sup>h)</sup> (mol/L) | K <sub>d</sub> (m <sup>3</sup> /kg) |
|-----|---------|---------------------|--------------------------|----------------------|-------------------------------|--------------------------------------|-------------------------|-------------------------------|------|--------------------------------------|-------------------------------------|
| 1   | Co      | 2                   | 0.745                    | 1.7                  | 78 <sup>i)</sup> [4]          | 760 <sup>i)</sup> [4]                | 200                     | 0.1                           | 4.4  | 1.00E-06                             | 3.98E-02                            |
| 2   | Co      | 2                   | 0.745                    | 1.7                  | 78 <sup>i)</sup> [4]          | 760 <sup>i)</sup> [4]                | 200                     | 0.1                           | 2.6  | 1.00E-06                             | 6.31E-02                            |
| 3   | Co      | 2                   | 0.745                    | 1.7                  | 78 <sup>i)</sup> [4]          | 760 <sup>i)</sup> [4]                | 200                     | 0.1                           | 3    | 1.00E-06                             | 6.31E-02                            |
| 4   | Co      | 2                   | 0.745                    | 1.7                  | 78 <sup>i)</sup> [4]          | 760 <sup>i)</sup> [4]                | 200                     | 0.1                           | 3.3  | 1.00E-06                             | 7.94E-02                            |
| 5   | Co      | 2                   | 0.745                    | 1.7                  | 78 <sup>i)</sup> [4]          | 760 <sup>i)</sup> [4]                | 200                     | 0.1                           | 5    | 1.00E-06                             | 1.00E-01                            |
| 6   | Co      | 2                   | 0.745                    | 1.7                  | 78 <sup>i)</sup> [4]          | 760 <sup>i)</sup> [4]                | 200                     | 0.1                           | 6    | 1.00E-06                             | 1.58E-01                            |
| 7   | Co      | 2                   | 0.745                    | 1.7                  | 78 <sup>i)</sup> [4]          | 760 <sup>i)</sup> [4]                | 200                     | 0.1                           | 7.3  | 1.00E-06                             | 6.31E-01                            |
| 8   | Co      | 2                   | 0.745                    | 1.7                  | 78 <sup>i)</sup> [4]          | 760 <sup>i)</sup> [4]                | 200                     | 0.1                           | 6.9  | 1.00E-06                             | 1.58E+00                            |
| 9   | Co      | 2                   | 0.745                    | 1.7                  | 78 <sup>i)</sup> [4]          | 760 <sup>i)</sup> [4]                | 200                     | 0.1                           | 7.6  | 1.00E-06                             | 2.51E+00                            |
| 10  | Na      | 1                   | 1.02                     | 1.01                 | 78 <sup>i)</sup> [4]          | 760 <sup>i)</sup> [4]                | 200                     | 0.1                           | 7.2  | 1.00E-06                             | 3.98E-03                            |
| 11  | Na      | 1                   | 1.02                     | 1.01                 | 78 <sup>i)</sup> [4]          | 760 <sup>i)</sup> [4]                | 200                     | 0.1                           | 4.3  | 1.00E-06                             | 5.01E-03                            |
| 12  | Na      | 1                   | 1.02                     | 1.01                 | 78 <sup>i)</sup> [4]          | 760 <sup>i)</sup> [4]                | 200                     | 0.1                           | 5    | 1.00E-06                             | 5.01E-03                            |
| 13  | Na      | 1                   | 1.02                     | 1.01                 | 78 <sup>i)</sup> [4]          | 760 <sup>i)</sup> [4]                | 200                     | 0.1                           | 5.8  | 1.00E-06                             | 5.01E-03                            |
| 14  | Na      | 1                   | 1.02                     | 1.01                 | 78 <sup>i)</sup> [4]          | 760 <sup>i)</sup> [4]                | 200                     | 0.1                           | 8    | 1.00E-06                             | 5.01E-03                            |
| 15  | Na      | 1                   | 1.02                     | 1.01                 | 78 <sup>i)</sup> [4]          | 760 <sup>i)</sup> [4]                | 200                     | 0.1                           | 9    | 1.00E-06                             | 5.01E-03                            |
| 16  | Sr      | 2                   | 1.18                     | 0.99                 | 78 <sup>i)</sup> [4]          | 760 <sup>i)</sup> [4]                | 200                     | 0.1                           | 3.9  | 1.00E-06                             | 1.58E-02                            |
| 17  | Sr      | 2                   | 1.18                     | 0.99                 | 78 <sup>i)</sup> [4]          | 760 <sup>i)</sup> [4]                | 200                     | 0.1                           | 4.3  | 1.00E-06                             | 2.51E-02                            |
| 18  | Sr      | 2                   | 1.18                     | 0.99                 | 78 <sup>i)</sup> [4]          | 760 <sup>i)</sup> [4]                | 200                     | 0.1                           | 5.5  | 1.00E-06                             | 2.51E-02                            |
| 19  | Sr      | 2                   | 1.18                     | 0.99                 | 78 <sup>i)</sup> [4]          | 760 <sup>i)</sup> [4]                | 200                     | 0.1                           | 7.1  | 1.00E-06                             | 3.16E-02                            |
| 20  | Sr      | 2                   | 1.18                     | 0.99                 | 78 <sup>i)</sup> [4]          | 760 <sup>i)</sup> [4]                | 200                     | 0.1                           | 8.1  | 1.00E-06                             | 6.31E-02                            |
| 21  | Sr      | 2                   | 1.18                     | 0.99                 | 78 <sup>i)</sup> [4]          | 760 <sup>i)</sup> [4]                | 200                     | 0.1                           | 8.9  | 1.00E-06                             | 6.31E-02                            |
| 22  | Sr      | 2                   | 1.18                     | 0.99                 | 78 <sup>i)</sup> [4]          | 760 <sup>i)</sup> [4]                | 200                     | 0.1                           | 9.7  | 1.00E-06                             | 7.94E-02                            |
| 23  | Am      | 3                   | 0.975                    | 1.2                  | 78 <sup>i)</sup> [4]          | 760 <sup>i)</sup> [4]                | 22.5                    | 0.0085 <sup>j)</sup> [6,7]    | 8.2  | 1.00E-09                             | 6.60E+00                            |
| 24  | Cs      | 1                   | 1.67                     | 0.86                 | 78 <sup>i)</sup> [4]          | 760 <sup>i)</sup> [4]                | 22.5                    | 0.0085 <sup>j)</sup> [6,7]    | 8.2  | 1.00E-10                             | 1.40E+00                            |
| 25  | Np      | 5                   | 0.75                     | 1.22                 | 78 <sup>i)</sup> [4]          | 760 <sup>i)</sup> [4]                | 22.5                    | 0.0085 <sup>j)</sup> [6,7]    | 8.2  | 1.00E-09                             | 1.20E-01                            |
| 26  | Pu      | 4                   | 0.86                     | 1.22                 | 78 <sup>i)</sup> [4]          | 760 <sup>i)</sup> [4]                | 22.5                    | 0.0085 <sup>j)</sup> [6,7]    | 8.2  | 1.00E-09                             | 3.50E+00                            |
| 27  | Sr      | 2                   | 1.18                     | 0.99                 | 78 <sup>i)</sup> [4]          | 760 <sup>i)</sup> [4]                | 22.5                    | 0.0085 <sup>j)</sup> [6,7]    | 8.2  | 1.00E-11                             | 2.90E+00                            |
| 28  | Th      | 4                   | 0.94                     | 1.11                 | 78 <sup>i)</sup> [4]          | 760 <sup>i)</sup> [4]                | 22.5                    | 0.0085 <sup>j)</sup> [6,7]    | 8.2  | 1.00E-14                             | 6.00E+00                            |
| 29  | U       | 6                   | 0.89                     | 1.22                 | 78 <sup>i)</sup> [4]          | 760 <sup>i)</sup> [4]                | 22.5                    | 0.0085 <sup>j)</sup> [6,7]    | 8.2  | 1.00E-08                             | 9.30E-02                            |
| 30  | Pa      | 5                   | 0.78                     | 1.14                 | 78 <sup>i)</sup> [4]          | 760 <sup>i)</sup> [4]                | 22.5                    | 0.0085 <sup>j)</sup> [6,7]    | 8.2  | 1.00E-13                             | 5.00E+00                            |
| 31  | Co      | 2                   | 0.745                    | 1.7                  | 78 <sup>i)</sup> [4]          | 760 <sup>i)</sup> [4]                | 200                     | 0.1                           | 8    | 1.00E-06                             | 7.94E+00                            |
| 32  | Co      | 2                   | 0.745                    | 1.7                  | 78 <sup>i)</sup> [4]          | 760 <sup>i)</sup> [4]                | 200                     | 0.1                           | 8.4  | 1.00E-06                             | 1.00E+01                            |
| 33  | Co      | 2                   | 0.745                    | 1.7                  | 78 <sup>i)</sup> [4]          | 760 <sup>i)</sup> [4]                | 200                     | 0.1                           | 9    | 1.00E-06                             | 3.98E+01                            |
| 34  | Co      | 2                   | 0.745                    | 1.7                  | 78 <sup>i)</sup> [4]          | 760 <sup>i)</sup> [4]                | 200                     | 0.1                           | 9.5  | 1.00E-06                             | 1.00E+02                            |
| 35  | Cs      | 1                   | 1.67                     | 0.86                 | 78 <sup>i)</sup> [4]          | 760 <sup>i)</sup> [4]                | 200                     | 0.1                           | 4.9  | 1.00E-06                             | 1.00E-01                            |
| 36  | Cs      | 1                   | 1.67                     | 0.86                 | 78 <sup>i)</sup> [4]          | 760 <sup>i)</sup> [4]                | 200                     | 0.1                           | 9.2  | 1.00E-06                             | 1.26E-01                            |
| 37  | Cs      | 1                   | 1.67                     | 0.86                 | 78 <sup>i)</sup> [4]          | 760 <sup>i)</sup> [4]                | 200                     | 0.1                           | 4    | 1.00E-06                             | 1.58E-01                            |
| 38  | Cs      | 1                   | 1.67                     | 0.86                 | 78 <sup>i)</sup> [4]          | 760 <sup>i)</sup> [4]                | 200                     | 0.1                           | 8    | 1.00E-06                             | 1.58E-01                            |
| 39  | Cs      | 1                   | 1.67                     | 0.86                 | 78 <sup>i)</sup> [4]          | 760 <sup>i)</sup> [4]                | 200                     | 0.1                           | 5.8  | 1.00E-06                             | 2.00E-01                            |
| 40  | Cs      | 1                   | 1.67                     | 0.86                 | 78 <sup>i)</sup> [4]          | 760 <sup>i)</sup> [4]                | 200                     | 0.1                           | 9.9  | 1.00E-06                             | 2.00E-01                            |
| 41  | Cs      | 1                   | 1.67                     | 0.86                 | 78 <sup>i)</sup> [4]          | 760 <sup>i)</sup> [4]                | 200                     | 0.1                           | 6.9  | 1.00E-06                             | 2.51E-01                            |
| 42  | Cs      | 1                   | 1.67                     | 0.86                 | 78 <sup>i)</sup> [4]          | 760 <sup>i)</sup> [4]                | 100                     | 0.1                           | 9.13 | 1.00E-01                             | 1.00E-02                            |

|    |    |   |      |      |                         |                          |      |       |      |          |          |
|----|----|---|------|------|-------------------------|--------------------------|------|-------|------|----------|----------|
| 43 | Cs | 1 | 1.67 | 0.86 | 78 <sup>i</sup> ) [4]   | 760 <sup>i</sup> ) [4]   | 100  | 0.1   | 9.11 | 3.00E-02 | 3.00E-02 |
| 44 | Cs | 1 | 1.67 | 0.86 | 78 <sup>i</sup> ) [4]   | 760 <sup>i</sup> ) [4]   | 100  | 0.1   | 9.12 | 1.00E-02 | 7.20E-02 |
| 45 | Cs | 1 | 1.67 | 0.86 | 78 <sup>i</sup> ) [4]   | 760 <sup>i</sup> ) [4]   | 100  | 0.1   | 9.14 | 3.00E-03 | 1.24E-01 |
| 46 | Cs | 1 | 1.67 | 0.86 | 78 <sup>i</sup> ) [4]   | 760 <sup>i</sup> ) [4]   | 100  | 0.1   | 9.16 | 1.00E-03 | 1.33E-01 |
| 47 | Cs | 1 | 1.67 | 0.86 | 78 <sup>i</sup> ) [4]   | 760 <sup>i</sup> ) [4]   | 100  | 0.1   | 9.18 | 3.00E-04 | 1.33E-01 |
| 48 | Cs | 1 | 1.67 | 0.86 | 78 <sup>i</sup> ) [4]   | 760 <sup>i</sup> ) [4]   | 100  | 0.1   | 9.18 | 1.00E-04 | 1.40E-01 |
| 49 | Cs | 1 | 1.67 | 0.86 | 78 <sup>i</sup> ) [4]   | 760 <sup>i</sup> ) [4]   | 100  | 0.1   | 9.18 | 3.00E-05 | 1.52E-01 |
| 50 | Cs | 1 | 1.67 | 0.86 | 78 <sup>i</sup> ) [4]   | 760 <sup>i</sup> ) [4]   | 100  | 0.1   | 9.18 | 1.00E-05 | 1.58E-01 |
| 51 | Cs | 1 | 1.67 | 0.86 | 78 <sup>i</sup> ) [4]   | 760 <sup>i</sup> ) [4]   | 100  | 0.1   | 9.18 | 3.00E-06 | 1.67E-01 |
| 52 | Cs | 1 | 1.67 | 0.86 | 78 <sup>i</sup> ) [4]   | 760 <sup>i</sup> ) [4]   | 100  | 0.1   | 9.18 | 1.00E-06 | 1.88E-01 |
| 53 | Cs | 1 | 1.67 | 0.86 | 78 <sup>i</sup> ) [4]   | 760 <sup>i</sup> ) [4]   | 100  | 0.1   | 9.18 | 3.00E-07 | 2.00E-01 |
| 54 | Cs | 1 | 1.67 | 0.86 | 78 <sup>i</sup> ) [4]   | 760 <sup>i</sup> ) [4]   | 100  | 0.1   | 9.18 | 1.00E-07 | 2.22E-01 |
| 55 | Cs | 1 | 1.67 | 0.86 | 78 <sup>i</sup> ) [4]   | 760 <sup>i</sup> ) [4]   | 100  | 0.1   | 9.18 | 3.00E-08 | 2.24E-01 |
| 56 | Cs | 1 | 1.67 | 0.86 | 78 <sup>i</sup> ) [4]   | 760 <sup>i</sup> ) [4]   | 100  | 0.1   | 9.18 | 1.00E-08 | 2.31E-01 |
| 57 | Sr | 2 | 1.18 | 0.99 | 78 <sup>i</sup> ) [4]   | 760 <sup>i</sup> ) [4]   | 200  | 0.1   | 7.9  | 1.00E-06 | 3.70E-02 |
| 58 | Sr | 2 | 1.18 | 0.99 | 78 <sup>i</sup> ) [4]   | 760 <sup>i</sup> ) [4]   | 20   | 0.1   | 8.2  | 1.00E-06 | 4.10E-02 |
| 59 | Sr | 2 | 1.18 | 0.99 | 78 <sup>i</sup> ) [4]   | 760 <sup>i</sup> ) [4]   | 200  | 0.1   | 7.7  | 1.00E-06 | 4.50E-02 |
| 60 | Sr | 2 | 1.18 | 0.99 | 78 <sup>i</sup> ) [4]   | 760 <sup>i</sup> ) [4]   | 20   | 0.1   | 8.2  | 1.00E-06 | 4.80E-02 |
| 61 | Sr | 2 | 1.18 | 0.99 | 78 <sup>i</sup> ) [4]   | 760 <sup>i</sup> ) [4]   | 20   | 0.01  | 8.7  | 1.00E-06 | 2.00E-01 |
| 62 | Sr | 2 | 1.18 | 0.99 | 78 <sup>i</sup> ) [4]   | 760 <sup>i</sup> ) [4]   | 20   | 0.01  | 8.9  | 1.00E-06 | 3.00E-01 |
| 63 | Sr | 2 | 1.18 | 0.99 | 78 <sup>i</sup> ) [4]   | 760 <sup>i</sup> ) [4]   | 200  | 0.01  | 7.8  | 1.00E-06 | 5.00E-01 |
| 64 | Sr | 2 | 1.18 | 0.99 | 78 <sup>i</sup> ) [4]   | 760 <sup>i</sup> ) [4]   | 200  | 0.01  | 8    | 1.00E-06 | 1.80E+00 |
| 65 | Cd | 2 | 0.95 | 1.46 | 76.4 <sup>i</sup> ) [5] | 31.82 <sup>i</sup> ) [5] | 2000 | 0.001 | 3.73 | 5.00E-05 | 2.17E+00 |
| 66 | Cd | 2 | 0.95 | 1.46 | 76.4 <sup>i</sup> ) [5] | 31.82 <sup>i</sup> ) [5] | 2000 | 0.001 | 4.01 | 5.00E-05 | 2.28E+00 |
| 67 | Cd | 2 | 0.95 | 1.46 | 76.4 <sup>i</sup> ) [5] | 31.82 <sup>i</sup> ) [5] | 2000 | 0.001 | 4.36 | 5.00E-05 | 2.47E+00 |
| 68 | Cd | 2 | 0.95 | 1.46 | 76.4 <sup>i</sup> ) [5] | 31.82 <sup>i</sup> ) [5] | 2000 | 0.001 | 4.68 | 5.00E-05 | 2.55E+00 |
| 69 | Cd | 2 | 0.95 | 1.46 | 76.4 <sup>i</sup> ) [5] | 31.82 <sup>i</sup> ) [5] | 2000 | 0.001 | 5.08 | 5.00E-05 | 2.62E+00 |
| 70 | Cd | 2 | 0.95 | 1.46 | 76.4 <sup>i</sup> ) [5] | 31.82 <sup>i</sup> ) [5] | 2000 | 0.001 | 5.62 | 5.00E-05 | 2.86E+00 |
| 71 | Cd | 2 | 0.95 | 1.46 | 76.4 <sup>i</sup> ) [5] | 31.82 <sup>i</sup> ) [5] | 2000 | 0.001 | 6.14 | 5.00E-05 | 3.68E+00 |
| 72 | Cd | 2 | 0.95 | 1.46 | 76.4 <sup>i</sup> ) [5] | 31.82 <sup>i</sup> ) [5] | 2000 | 0.001 | 6.79 | 5.00E-05 | 3.55E+00 |
| 73 | Cd | 2 | 0.95 | 1.46 | 76.4 <sup>i</sup> ) [5] | 31.82 <sup>i</sup> ) [5] | 2000 | 0.001 | 7.3  | 5.00E-05 | 3.86E+00 |
| 74 | Cd | 2 | 0.95 | 1.46 | 76.4 <sup>i</sup> ) [5] | 31.82 <sup>i</sup> ) [5] | 2000 | 0.001 | 7.51 | 5.00E-05 | 4.21E+00 |
| 75 | Cd | 2 | 0.95 | 1.46 | 76.4 <sup>i</sup> ) [5] | 31.82 <sup>i</sup> ) [5] | 2000 | 0.001 | 8    | 5.00E-05 | 8.25E+00 |
| 76 | Cd | 2 | 0.95 | 1.46 | 76.4 <sup>i</sup> ) [5] | 31.82 <sup>i</sup> ) [5] | 2000 | 0.001 | 8.43 | 5.00E-05 | 1.23E+01 |
| 77 | Cd | 2 | 0.95 | 1.46 | 76.4 <sup>i</sup> ) [5] | 31.82 <sup>i</sup> ) [5] | 2000 | 0.001 | 9.38 | 5.00E-05 | 9.19E+01 |
| 78 | Cd | 2 | 0.95 | 1.46 | 76.4 <sup>i</sup> ) [5] | 31.82 <sup>i</sup> ) [5] | 2000 | 0.02  | 3.01 | 5.00E-05 | 3.95E-01 |
| 79 | Cd | 2 | 0.95 | 1.46 | 76.4 <sup>i</sup> ) [5] | 31.82 <sup>i</sup> ) [5] | 2000 | 0.02  | 3.54 | 5.00E-05 | 5.03E-01 |
| 80 | Cd | 2 | 0.95 | 1.46 | 76.4 <sup>i</sup> ) [5] | 31.82 <sup>i</sup> ) [5] | 2000 | 0.02  | 4.22 | 5.00E-05 | 5.31E-01 |
| 81 | Cd | 2 | 0.95 | 1.46 | 76.4 <sup>i</sup> ) [5] | 31.82 <sup>i</sup> ) [5] | 2000 | 0.02  | 4.44 | 5.00E-05 | 5.93E-01 |
| 82 | Cd | 2 | 0.95 | 1.46 | 76.4 <sup>i</sup> ) [5] | 31.82 <sup>i</sup> ) [5] | 2000 | 0.02  | 4.75 | 5.00E-05 | 7.60E-01 |
| 83 | Cd | 2 | 0.95 | 1.46 | 76.4 <sup>i</sup> ) [5] | 31.82 <sup>i</sup> ) [5] | 2000 | 0.02  | 5.31 | 5.00E-05 | 6.01E-01 |
| 84 | Cd | 2 | 0.95 | 1.46 | 76.4 <sup>i</sup> ) [5] | 31.82 <sup>i</sup> ) [5] | 2000 | 0.02  | 5.61 | 5.00E-05 | 5.66E-01 |
| 85 | Cd | 2 | 0.95 | 1.46 | 76.4 <sup>i</sup> ) [5] | 31.82 <sup>i</sup> ) [5] | 2000 | 0.02  | 5.97 | 5.00E-05 | 5.60E-01 |
| 86 | Cd | 2 | 0.95 | 1.46 | 76.4 <sup>i</sup> ) [5] | 31.82 <sup>i</sup> ) [5] | 2000 | 0.02  | 6.73 | 5.00E-05 | 6.91E-01 |
| 87 | Cd | 2 | 0.95 | 1.46 | 76.4 <sup>i</sup> ) [5] | 31.82 <sup>i</sup> ) [5] | 2000 | 0.02  | 7.26 | 5.00E-05 | 9.62E-01 |

|     |    |   |      |      |                       |                        |      |      |      |          |          |
|-----|----|---|------|------|-----------------------|------------------------|------|------|------|----------|----------|
| 88  | Cd | 2 | 0.95 | 1.46 | 76.4 <sup>j</sup> [5] | 31.82 <sup>j</sup> [5] | 2000 | 0.02 | 7.7  | 5.00E-05 | 1.32E+00 |
| 89  | Cd | 2 | 0.95 | 1.46 | 76.4 <sup>j</sup> [5] | 31.82 <sup>j</sup> [5] | 2000 | 0.02 | 8.11 | 5.00E-05 | 1.94E+00 |
| 90  | Cd | 2 | 0.95 | 1.46 | 76.4 <sup>j</sup> [5] | 31.82 <sup>j</sup> [5] | 2000 | 0.02 | 8.58 | 5.00E-05 | 3.80E+00 |
| 91  | Cd | 2 | 0.95 | 1.46 | 76.4 <sup>j</sup> [5] | 31.82 <sup>j</sup> [5] | 2000 | 0.02 | 8.97 | 5.00E-05 | 8.86E+00 |
| 92  | Cd | 2 | 0.95 | 1.46 | 76.4 <sup>j</sup> [5] | 31.82 <sup>j</sup> [5] | 2000 | 0.02 | 9.69 | 5.00E-05 | 2.29E+01 |
| 93  | Cd | 2 | 0.95 | 1.46 | 76.4 <sup>j</sup> [5] | 31.82 <sup>j</sup> [5] | 2000 | 0.1  | 3.54 | 5.00E-05 | 4.80E-02 |
| 94  | Cd | 2 | 0.95 | 1.46 | 76.4 <sup>j</sup> [5] | 31.82 <sup>j</sup> [5] | 2000 | 0.1  | 4.07 | 5.00E-05 | 6.62E-02 |
| 95  | Cd | 2 | 0.95 | 1.46 | 76.4 <sup>j</sup> [5] | 31.82 <sup>j</sup> [5] | 2000 | 0.1  | 4.44 | 5.00E-05 | 7.10E-02 |
| 96  | Cd | 2 | 0.95 | 1.46 | 76.4 <sup>j</sup> [5] | 31.82 <sup>j</sup> [5] | 2000 | 0.1  | 4.75 | 5.00E-05 | 5.30E-03 |
| 97  | Cd | 2 | 0.95 | 1.46 | 76.4 <sup>j</sup> [5] | 31.82 <sup>j</sup> [5] | 2000 | 0.1  | 5.18 | 5.00E-05 | 2.70E-02 |
| 98  | Cd | 2 | 0.95 | 1.46 | 76.4 <sup>j</sup> [5] | 31.82 <sup>j</sup> [5] | 2000 | 0.1  | 5.57 | 5.00E-05 | 4.48E-02 |
| 99  | Cd | 2 | 0.95 | 1.46 | 76.4 <sup>j</sup> [5] | 31.82 <sup>j</sup> [5] | 2000 | 0.1  | 6.03 | 5.00E-05 | 1.33E-01 |
| 100 | Cd | 2 | 0.95 | 1.46 | 76.4 <sup>j</sup> [5] | 31.82 <sup>j</sup> [5] | 2000 | 0.1  | 6.29 | 5.00E-05 | 9.05E-02 |
| 101 | Cd | 2 | 0.95 | 1.46 | 76.4 <sup>j</sup> [5] | 31.82 <sup>j</sup> [5] | 2000 | 0.1  | 6.88 | 5.00E-05 | 2.18E-01 |
| 102 | Cd | 2 | 0.95 | 1.46 | 76.4 <sup>j</sup> [5] | 31.82 <sup>j</sup> [5] | 2000 | 0.1  | 7.22 | 5.00E-05 | 1.73E-01 |
| 103 | Cd | 2 | 0.95 | 1.46 | 76.4 <sup>j</sup> [5] | 31.82 <sup>j</sup> [5] | 2000 | 0.1  | 8.03 | 5.00E-05 | 4.36E-01 |
| 104 | Cd | 2 | 0.95 | 1.46 | 76.4 <sup>j</sup> [5] | 31.82 <sup>j</sup> [5] | 2000 | 0.1  | 8.7  | 5.00E-05 | 1.33E+00 |
| 105 | Cd | 2 | 0.95 | 1.46 | 76.4 <sup>j</sup> [5] | 31.82 <sup>j</sup> [5] | 2000 | 0.1  | 9.3  | 5.00E-05 | 5.05E+00 |
| 106 | Cd | 2 | 0.95 | 1.46 | 76.4 <sup>j</sup> [5] | 31.82 <sup>j</sup> [5] | 2000 | 0.1  | 9.94 | 5.00E-05 | 1.66E+01 |
| 107 | Cd | 2 | 0.95 | 1.46 | 76.4 <sup>j</sup> [5] | 31.82 <sup>j</sup> [5] | 2000 | 0.02 | 3.03 | 5.00E-06 | 8.58E-01 |
| 108 | Cd | 2 | 0.95 | 1.46 | 76.4 <sup>j</sup> [5] | 31.82 <sup>j</sup> [5] | 2000 | 0.02 | 3.7  | 5.00E-06 | 8.94E-01 |
| 109 | Cd | 2 | 0.95 | 1.46 | 76.4 <sup>j</sup> [5] | 31.82 <sup>j</sup> [5] | 2000 | 0.02 | 4.3  | 5.00E-06 | 9.86E-01 |
| 110 | Cd | 2 | 0.95 | 1.46 | 76.4 <sup>j</sup> [5] | 31.82 <sup>j</sup> [5] | 2000 | 0.02 | 4.6  | 5.00E-06 | 1.04E+00 |
| 111 | Cd | 2 | 0.95 | 1.46 | 76.4 <sup>j</sup> [5] | 31.82 <sup>j</sup> [5] | 2000 | 0.02 | 5.29 | 5.00E-06 | 1.20E+00 |
| 112 | Cd | 2 | 0.95 | 1.46 | 76.4 <sup>j</sup> [5] | 31.82 <sup>j</sup> [5] | 2000 | 0.02 | 5.82 | 5.00E-06 | 1.38E+00 |
| 113 | Cd | 2 | 0.95 | 1.46 | 76.4 <sup>j</sup> [5] | 31.82 <sup>j</sup> [5] | 2000 | 0.02 | 5.98 | 5.00E-06 | 1.45E+00 |
| 114 | Cd | 2 | 0.95 | 1.46 | 76.4 <sup>j</sup> [5] | 31.82 <sup>j</sup> [5] | 2000 | 0.02 | 6.29 | 5.00E-06 | 1.92E+00 |
| 115 | Cd | 2 | 0.95 | 1.46 | 76.4 <sup>j</sup> [5] | 31.82 <sup>j</sup> [5] | 2000 | 0.02 | 6.58 | 5.00E-06 | 1.69E+00 |
| 116 | Cd | 2 | 0.95 | 1.46 | 76.4 <sup>j</sup> [5] | 31.82 <sup>j</sup> [5] | 2000 | 0.02 | 6.8  | 5.00E-06 | 2.67E+00 |
| 117 | Cd | 2 | 0.95 | 1.46 | 76.4 <sup>j</sup> [5] | 31.82 <sup>j</sup> [5] | 2000 | 0.02 | 6.96 | 5.00E-06 | 2.67E+00 |
| 118 | Cd | 2 | 0.95 | 1.46 | 76.4 <sup>j</sup> [5] | 31.82 <sup>j</sup> [5] | 2000 | 0.02 | 7.37 | 5.00E-06 | 2.92E+00 |
| 119 | Cd | 2 | 0.95 | 1.46 | 76.4 <sup>j</sup> [5] | 31.82 <sup>j</sup> [5] | 2000 | 0.02 | 8.33 | 5.00E-06 | 9.94E+00 |
| 120 | Cd | 2 | 0.95 | 1.46 | 76.4 <sup>j</sup> [5] | 31.82 <sup>j</sup> [5] | 2000 | 0.02 | 8.96 | 5.00E-06 | 3.56E+01 |
| 121 | Cd | 2 | 0.95 | 1.46 | 76.4 <sup>j</sup> [5] | 31.82 <sup>j</sup> [5] | 2000 | 0.02 | 9.66 | 5.00E-06 | 9.07E+02 |
| 122 | Cd | 2 | 0.95 | 1.46 | 76.4 <sup>j</sup> [5] | 31.82 <sup>j</sup> [5] | 2000 | 0.1  | 3.12 | 5.00E-06 | 4.31E-03 |
| 123 | Cd | 2 | 0.95 | 1.46 | 76.4 <sup>j</sup> [5] | 31.82 <sup>j</sup> [5] | 2000 | 0.1  | 4.88 | 5.00E-06 | 1.51E-01 |
| 124 | Cd | 2 | 0.95 | 1.46 | 76.4 <sup>j</sup> [5] | 31.82 <sup>j</sup> [5] | 2000 | 0.1  | 5.79 | 5.00E-06 | 9.94E-02 |
| 125 | Cd | 2 | 0.95 | 1.46 | 76.4 <sup>j</sup> [5] | 31.82 <sup>j</sup> [5] | 2000 | 0.1  | 6.07 | 5.00E-06 | 1.67E-01 |
| 126 | Cd | 2 | 0.95 | 1.46 | 76.4 <sup>j</sup> [5] | 31.82 <sup>j</sup> [5] | 2000 | 0.1  | 6.35 | 5.00E-06 | 1.19E-01 |
| 127 | Cd | 2 | 0.95 | 1.46 | 76.4 <sup>j</sup> [5] | 31.82 <sup>j</sup> [5] | 2000 | 0.1  | 6.75 | 5.00E-06 | 5.33E-01 |
| 128 | Cd | 2 | 0.95 | 1.46 | 76.4 <sup>j</sup> [5] | 31.82 <sup>j</sup> [5] | 2000 | 0.1  | 6.94 | 5.00E-06 | 6.47E-01 |
| 129 | Cd | 2 | 0.95 | 1.46 | 76.4 <sup>j</sup> [5] | 31.82 <sup>j</sup> [5] | 2000 | 0.1  | 7.58 | 5.00E-06 | 1.30E+00 |
| 130 | Cd | 2 | 0.95 | 1.46 | 76.4 <sup>j</sup> [5] | 31.82 <sup>j</sup> [5] | 2000 | 0.1  | 7.91 | 5.00E-06 | 1.76E+00 |
| 131 | Cd | 2 | 0.95 | 1.46 | 76.4 <sup>j</sup> [5] | 31.82 <sup>j</sup> [5] | 2000 | 0.1  | 9.27 | 5.00E-06 | 3.05E+01 |
| 132 | Cd | 2 | 0.95 | 1.46 | 76.4 <sup>j</sup> [5] | 31.82 <sup>j</sup> [5] | 2000 | 0.1  | 9.9  | 5.00E-06 | 2.22E+01 |

|     |    |   |       |      |                       |                        |      |       |      |          |          |
|-----|----|---|-------|------|-----------------------|------------------------|------|-------|------|----------|----------|
| 133 | Cd | 2 | 0.95  | 1.46 | 76.4 <sup>j</sup> [5] | 31.82 <sup>j</sup> [5] | 2000 | 0.1   | 3.1  | 5.00E-07 | 8.38E-02 |
| 134 | Cd | 2 | 0.95  | 1.46 | 76.4 <sup>j</sup> [5] | 31.82 <sup>j</sup> [5] | 2000 | 0.1   | 3.62 | 5.00E-07 | 7.04E-02 |
| 135 | Cd | 2 | 0.95  | 1.46 | 76.4 <sup>j</sup> [5] | 31.82 <sup>j</sup> [5] | 2000 | 0.1   | 4.1  | 5.00E-07 | 1.91E-01 |
| 136 | Cd | 2 | 0.95  | 1.46 | 76.4 <sup>j</sup> [5] | 31.82 <sup>j</sup> [5] | 2000 | 0.1   | 4.76 | 5.00E-07 | 3.78E-01 |
| 137 | Cd | 2 | 0.95  | 1.46 | 76.4 <sup>j</sup> [5] | 31.82 <sup>j</sup> [5] | 2000 | 0.1   | 5.03 | 5.00E-07 | 1.04E-01 |
| 138 | Cd | 2 | 0.95  | 1.46 | 76.4 <sup>j</sup> [5] | 31.82 <sup>j</sup> [5] | 2000 | 0.1   | 5.53 | 5.00E-07 | 1.57E-01 |
| 139 | Cd | 2 | 0.95  | 1.46 | 76.4 <sup>j</sup> [5] | 31.82 <sup>j</sup> [5] | 2000 | 0.1   | 5.97 | 5.00E-07 | 4.28E-01 |
| 140 | Cd | 2 | 0.95  | 1.46 | 76.4 <sup>j</sup> [5] | 31.82 <sup>j</sup> [5] | 2000 | 0.1   | 6.26 | 5.00E-07 | 6.39E-01 |
| 141 | Cd | 2 | 0.95  | 1.46 | 76.4 <sup>j</sup> [5] | 31.82 <sup>j</sup> [5] | 2000 | 0.1   | 6.64 | 5.00E-07 | 1.20E+00 |
| 142 | Cd | 2 | 0.95  | 1.46 | 76.4 <sup>j</sup> [5] | 31.82 <sup>j</sup> [5] | 2000 | 0.1   | 6.95 | 5.00E-07 | 1.33E+00 |
| 143 | Cd | 2 | 0.95  | 1.46 | 76.4 <sup>j</sup> [5] | 31.82 <sup>j</sup> [5] | 2000 | 0.1   | 6.99 | 5.00E-07 | 1.93E+00 |
| 144 | Cd | 2 | 0.95  | 1.46 | 76.4 <sup>j</sup> [5] | 31.82 <sup>j</sup> [5] | 2000 | 0.1   | 7.43 | 5.00E-07 | 2.79E+00 |
| 145 | Cd | 2 | 0.95  | 1.46 | 76.4 <sup>j</sup> [5] | 31.82 <sup>j</sup> [5] | 2000 | 0.1   | 8.14 | 5.00E-07 | 4.65E+00 |
| 146 | Cd | 2 | 0.95  | 1.46 | 76.4 <sup>j</sup> [5] | 31.82 <sup>j</sup> [5] | 2000 | 0.1   | 8.66 | 5.00E-07 | 1.14E+02 |
| 147 | Co | 2 | 0.745 | 1.7  | 76.4 <sup>j</sup> [5] | 31.82 <sup>j</sup> [5] | 2000 | 0.001 | 3.2  | 5.00E-05 | 2.03E+00 |
| 148 | Co | 2 | 0.745 | 1.7  | 76.4 <sup>j</sup> [5] | 31.82 <sup>j</sup> [5] | 2000 | 0.001 | 3.64 | 5.00E-05 | 2.14E+00 |
| 149 | Co | 2 | 0.745 | 1.7  | 76.4 <sup>j</sup> [5] | 31.82 <sup>j</sup> [5] | 2000 | 0.001 | 4.29 | 5.00E-05 | 2.25E+00 |
| 150 | Co | 2 | 0.745 | 1.7  | 76.4 <sup>j</sup> [5] | 31.82 <sup>j</sup> [5] | 2000 | 0.001 | 4.55 | 5.00E-05 | 2.12E+00 |
| 151 | Co | 2 | 0.745 | 1.7  | 76.4 <sup>j</sup> [5] | 31.82 <sup>j</sup> [5] | 2000 | 0.001 | 4.82 | 5.00E-05 | 2.55E+00 |
| 152 | Co | 2 | 0.745 | 1.7  | 76.4 <sup>j</sup> [5] | 31.82 <sup>j</sup> [5] | 2000 | 0.001 | 5.19 | 5.00E-05 | 3.44E+00 |
| 153 | Co | 2 | 0.745 | 1.7  | 76.4 <sup>j</sup> [5] | 31.82 <sup>j</sup> [5] | 2000 | 0.001 | 5.88 | 5.00E-05 | 3.73E+00 |
| 154 | Co | 2 | 0.745 | 1.7  | 76.4 <sup>j</sup> [5] | 31.82 <sup>j</sup> [5] | 2000 | 0.001 | 6.23 | 5.00E-05 | 3.80E+00 |
| 155 | Co | 2 | 0.745 | 1.7  | 76.4 <sup>j</sup> [5] | 31.82 <sup>j</sup> [5] | 2000 | 0.001 | 6.58 | 5.00E-05 | 3.00E+00 |
| 156 | Co | 2 | 0.745 | 1.7  | 76.4 <sup>j</sup> [5] | 31.82 <sup>j</sup> [5] | 2000 | 0.001 | 6.94 | 5.00E-05 | 2.92E+00 |
| 157 | Co | 2 | 0.745 | 1.7  | 76.4 <sup>j</sup> [5] | 31.82 <sup>j</sup> [5] | 2000 | 0.001 | 7.64 | 5.00E-05 | 3.43E+00 |
| 158 | Co | 2 | 0.745 | 1.7  | 76.4 <sup>j</sup> [5] | 31.82 <sup>j</sup> [5] | 2000 | 0.001 | 8    | 5.00E-05 | 4.64E+00 |
| 159 | Co | 2 | 0.745 | 1.7  | 76.4 <sup>j</sup> [5] | 31.82 <sup>j</sup> [5] | 2000 | 0.001 | 9.1  | 5.00E-05 | 1.03E+01 |
| 160 | Co | 2 | 0.745 | 1.7  | 76.4 <sup>j</sup> [5] | 31.82 <sup>j</sup> [5] | 2000 | 0.001 | 9.85 | 5.00E-05 | 1.88E+02 |
| 161 | Co | 2 | 0.745 | 1.7  | 76.4 <sup>j</sup> [5] | 31.82 <sup>j</sup> [5] | 2000 | 0.02  | 3.64 | 5.00E-05 | 5.27E-01 |
| 162 | Co | 2 | 0.745 | 1.7  | 76.4 <sup>j</sup> [5] | 31.82 <sup>j</sup> [5] | 2000 | 0.02  | 4.06 | 5.00E-05 | 5.75E-01 |
| 163 | Co | 2 | 0.745 | 1.7  | 76.4 <sup>j</sup> [5] | 31.82 <sup>j</sup> [5] | 2000 | 0.02  | 4.47 | 5.00E-05 | 6.10E-01 |
| 164 | Co | 2 | 0.745 | 1.7  | 76.4 <sup>j</sup> [5] | 31.82 <sup>j</sup> [5] | 2000 | 0.02  | 4.78 | 5.00E-05 | 6.61E-01 |
| 165 | Co | 2 | 0.745 | 1.7  | 76.4 <sup>j</sup> [5] | 31.82 <sup>j</sup> [5] | 2000 | 0.02  | 5.31 | 5.00E-05 | 6.68E-01 |
| 166 | Co | 2 | 0.745 | 1.7  | 76.4 <sup>j</sup> [5] | 31.82 <sup>j</sup> [5] | 2000 | 0.02  | 5.75 | 5.00E-05 | 6.75E-01 |
| 167 | Co | 2 | 0.745 | 1.7  | 76.4 <sup>j</sup> [5] | 31.82 <sup>j</sup> [5] | 2000 | 0.02  | 6.17 | 5.00E-05 | 7.44E-01 |
| 168 | Co | 2 | 0.745 | 1.7  | 76.4 <sup>j</sup> [5] | 31.82 <sup>j</sup> [5] | 2000 | 0.02  | 6.42 | 5.00E-05 | 6.67E-01 |
| 169 | Co | 2 | 0.745 | 1.7  | 76.4 <sup>j</sup> [5] | 31.82 <sup>j</sup> [5] | 2000 | 0.02  | 6.68 | 5.00E-05 | 6.82E-01 |
| 170 | Co | 2 | 0.745 | 1.7  | 76.4 <sup>j</sup> [5] | 31.82 <sup>j</sup> [5] | 2000 | 0.02  | 7.02 | 5.00E-05 | 6.51E-01 |
| 171 | Co | 2 | 0.745 | 1.7  | 76.4 <sup>j</sup> [5] | 31.82 <sup>j</sup> [5] | 2000 | 0.02  | 7.3  | 5.00E-05 | 6.51E-01 |
| 172 | Co | 2 | 0.745 | 1.7  | 76.4 <sup>j</sup> [5] | 31.82 <sup>j</sup> [5] | 2000 | 0.02  | 7.96 | 5.00E-05 | 9.47E-01 |
| 173 | Co | 2 | 0.745 | 1.7  | 76.4 <sup>j</sup> [5] | 31.82 <sup>j</sup> [5] | 2000 | 0.02  | 8.61 | 5.00E-05 | 5.08E+00 |
| 174 | Co | 2 | 0.745 | 1.7  | 76.4 <sup>j</sup> [5] | 31.82 <sup>j</sup> [5] | 2000 | 0.02  | 9.79 | 5.00E-05 | 1.46E+01 |
| 175 | Co | 2 | 0.745 | 1.7  | 76.4 <sup>j</sup> [5] | 31.82 <sup>j</sup> [5] | 2000 | 0.1   | 3.54 | 5.00E-05 | 4.28E-02 |
| 176 | Co | 2 | 0.745 | 1.7  | 76.4 <sup>j</sup> [5] | 31.82 <sup>j</sup> [5] | 2000 | 0.1   | 3.94 | 5.00E-05 | 8.75E-02 |
| 177 | Co | 2 | 0.745 | 1.7  | 76.4 <sup>j</sup> [5] | 31.82 <sup>j</sup> [5] | 2000 | 0.1   | 4.47 | 5.00E-05 | 9.17E-02 |

|     |    |   |       |     |                       |                        |      |      |      |          |          |
|-----|----|---|-------|-----|-----------------------|------------------------|------|------|------|----------|----------|
| 178 | Co | 2 | 0.745 | 1.7 | 76.4 <sup>j</sup> [5] | 31.82 <sup>j</sup> [5] | 2000 | 0.1  | 4.93 | 5.00E-05 | 1.10E-01 |
| 179 | Co | 2 | 0.745 | 1.7 | 76.4 <sup>j</sup> [5] | 31.82 <sup>j</sup> [5] | 2000 | 0.1  | 5.18 | 5.00E-05 | 1.15E-01 |
| 180 | Co | 2 | 0.745 | 1.7 | 76.4 <sup>j</sup> [5] | 31.82 <sup>j</sup> [5] | 2000 | 0.1  | 5.96 | 5.00E-05 | 1.14E-01 |
| 181 | Co | 2 | 0.745 | 1.7 | 76.4 <sup>j</sup> [5] | 31.82 <sup>j</sup> [5] | 2000 | 0.1  | 6.09 | 5.00E-05 | 6.34E-02 |
| 182 | Co | 2 | 0.745 | 1.7 | 76.4 <sup>j</sup> [5] | 31.82 <sup>j</sup> [5] | 2000 | 0.1  | 6.88 | 5.00E-05 | 1.42E-01 |
| 183 | Co | 2 | 0.745 | 1.7 | 76.4 <sup>j</sup> [5] | 31.82 <sup>j</sup> [5] | 2000 | 0.1  | 7.4  | 5.00E-05 | 1.47E-01 |
| 184 | Co | 2 | 0.745 | 1.7 | 76.4 <sup>j</sup> [5] | 31.82 <sup>j</sup> [5] | 2000 | 0.1  | 7.78 | 5.00E-05 | 2.11E-01 |
| 185 | Co | 2 | 0.745 | 1.7 | 76.4 <sup>j</sup> [5] | 31.82 <sup>j</sup> [5] | 2000 | 0.1  | 8.51 | 5.00E-05 | 1.99E+00 |
| 186 | Co | 2 | 0.745 | 1.7 | 76.4 <sup>j</sup> [5] | 31.82 <sup>j</sup> [5] | 2000 | 0.1  | 9.82 | 5.00E-05 | 1.34E+02 |
| 187 | Co | 2 | 0.745 | 1.7 | 76.4 <sup>j</sup> [5] | 31.82 <sup>j</sup> [5] | 2000 | 0.02 | 3.05 | 5.00E-06 | 7.16E-01 |
| 188 | Co | 2 | 0.745 | 1.7 | 76.4 <sup>j</sup> [5] | 31.82 <sup>j</sup> [5] | 2000 | 0.02 | 3.62 | 5.00E-06 | 8.04E-01 |
| 189 | Co | 2 | 0.745 | 1.7 | 76.4 <sup>j</sup> [5] | 31.82 <sup>j</sup> [5] | 2000 | 0.02 | 4.09 | 5.00E-06 | 9.24E-01 |
| 190 | Co | 2 | 0.745 | 1.7 | 76.4 <sup>j</sup> [5] | 31.82 <sup>j</sup> [5] | 2000 | 0.02 | 4.65 | 5.00E-06 | 1.03E+00 |
| 191 | Co | 2 | 0.745 | 1.7 | 76.4 <sup>j</sup> [5] | 31.82 <sup>j</sup> [5] | 2000 | 0.02 | 5.08 | 5.00E-06 | 1.16E+00 |
| 192 | Co | 2 | 0.745 | 1.7 | 76.4 <sup>j</sup> [5] | 31.82 <sup>j</sup> [5] | 2000 | 0.02 | 5.67 | 5.00E-06 | 1.33E+00 |
| 193 | Co | 2 | 0.745 | 1.7 | 76.4 <sup>j</sup> [5] | 31.82 <sup>j</sup> [5] | 2000 | 0.02 | 6.12 | 5.00E-06 | 1.30E+00 |
| 194 | Co | 2 | 0.745 | 1.7 | 76.4 <sup>j</sup> [5] | 31.82 <sup>j</sup> [5] | 2000 | 0.02 | 6.37 | 5.00E-06 | 1.67E+00 |
| 195 | Co | 2 | 0.745 | 1.7 | 76.4 <sup>j</sup> [5] | 31.82 <sup>j</sup> [5] | 2000 | 0.02 | 6.65 | 5.00E-06 | 1.75E+00 |
| 196 | Co | 2 | 0.745 | 1.7 | 76.4 <sup>j</sup> [5] | 31.82 <sup>j</sup> [5] | 2000 | 0.02 | 6.67 | 5.00E-06 | 1.24E+00 |
| 197 | Co | 2 | 0.745 | 1.7 | 76.4 <sup>j</sup> [5] | 31.82 <sup>j</sup> [5] | 2000 | 0.02 | 7.24 | 5.00E-06 | 2.22E+00 |
| 198 | Co | 2 | 0.745 | 1.7 | 76.4 <sup>j</sup> [5] | 31.82 <sup>j</sup> [5] | 2000 | 0.02 | 8.1  | 5.00E-06 | 3.46E+00 |
| 199 | Co | 2 | 0.745 | 1.7 | 76.4 <sup>j</sup> [5] | 31.82 <sup>j</sup> [5] | 2000 | 0.02 | 9.01 | 5.00E-06 | 1.18E+01 |
| 200 | Co | 2 | 0.745 | 1.7 | 76.4 <sup>j</sup> [5] | 31.82 <sup>j</sup> [5] | 2000 | 0.02 | 9.96 | 5.00E-06 | 1.16E+02 |
| 201 | Co | 2 | 0.745 | 1.7 | 76.4 <sup>j</sup> [5] | 31.82 <sup>j</sup> [5] | 2000 | 0.1  | 3.05 | 5.00E-06 | 7.44E-02 |
| 202 | Co | 2 | 0.745 | 1.7 | 76.4 <sup>j</sup> [5] | 31.82 <sup>j</sup> [5] | 2000 | 0.1  | 3.69 | 5.00E-06 | 6.49E-02 |
| 203 | Co | 2 | 0.745 | 1.7 | 76.4 <sup>j</sup> [5] | 31.82 <sup>j</sup> [5] | 2000 | 0.1  | 4.19 | 5.00E-06 | 1.15E-01 |
| 204 | Co | 2 | 0.745 | 1.7 | 76.4 <sup>j</sup> [5] | 31.82 <sup>j</sup> [5] | 2000 | 0.1  | 4.74 | 5.00E-06 | 1.48E-01 |
| 205 | Co | 2 | 0.745 | 1.7 | 76.4 <sup>j</sup> [5] | 31.82 <sup>j</sup> [5] | 2000 | 0.1  | 5.16 | 5.00E-06 | 2.99E-01 |
| 206 | Co | 2 | 0.745 | 1.7 | 76.4 <sup>j</sup> [5] | 31.82 <sup>j</sup> [5] | 2000 | 0.1  | 5.78 | 5.00E-06 | 2.23E-01 |
| 207 | Co | 2 | 0.745 | 1.7 | 76.4 <sup>j</sup> [5] | 31.82 <sup>j</sup> [5] | 2000 | 0.1  | 6.09 | 5.00E-06 | 3.79E-01 |
| 208 | Co | 2 | 0.745 | 1.7 | 76.4 <sup>j</sup> [5] | 31.82 <sup>j</sup> [5] | 2000 | 0.1  | 6.19 | 5.00E-06 | 3.50E-01 |
| 209 | Co | 2 | 0.745 | 1.7 | 76.4 <sup>j</sup> [5] | 31.82 <sup>j</sup> [5] | 2000 | 0.1  | 6.69 | 5.00E-06 | 4.98E-01 |
| 210 | Co | 2 | 0.745 | 1.7 | 76.4 <sup>j</sup> [5] | 31.82 <sup>j</sup> [5] | 2000 | 0.1  | 6.81 | 5.00E-06 | 4.78E-01 |
| 211 | Co | 2 | 0.745 | 1.7 | 76.4 <sup>j</sup> [5] | 31.82 <sup>j</sup> [5] | 2000 | 0.1  | 6.96 | 5.00E-06 | 6.15E-01 |
| 212 | Co | 2 | 0.745 | 1.7 | 76.4 <sup>j</sup> [5] | 31.82 <sup>j</sup> [5] | 2000 | 0.1  | 7.28 | 5.00E-06 | 6.81E-01 |
| 213 | Co | 2 | 0.745 | 1.7 | 76.4 <sup>j</sup> [5] | 31.82 <sup>j</sup> [5] | 2000 | 0.1  | 8.24 | 5.00E-06 | 1.49E+00 |
| 214 | Co | 2 | 0.745 | 1.7 | 76.4 <sup>j</sup> [5] | 31.82 <sup>j</sup> [5] | 2000 | 0.1  | 9.22 | 5.00E-06 | 2.12E+01 |
| 215 | Co | 2 | 0.745 | 1.7 | 76.4 <sup>j</sup> [5] | 31.82 <sup>j</sup> [5] | 2000 | 0.1  | 4.2  | 5.00E-07 | 6.54E-01 |
| 216 | Co | 2 | 0.745 | 1.7 | 76.4 <sup>j</sup> [5] | 31.82 <sup>j</sup> [5] | 2000 | 0.1  | 4.62 | 5.00E-07 | 8.03E-01 |
| 217 | Co | 2 | 0.745 | 1.7 | 76.4 <sup>j</sup> [5] | 31.82 <sup>j</sup> [5] | 2000 | 0.1  | 5.2  | 5.00E-07 | 1.02E+00 |
| 218 | Co | 2 | 0.745 | 1.7 | 76.4 <sup>j</sup> [5] | 31.82 <sup>j</sup> [5] | 2000 | 0.1  | 5.79 | 5.00E-07 | 1.49E+00 |
| 219 | Co | 2 | 0.745 | 1.7 | 76.4 <sup>j</sup> [5] | 31.82 <sup>j</sup> [5] | 2000 | 0.1  | 6.3  | 5.00E-07 | 2.11E+00 |
| 220 | Co | 2 | 0.745 | 1.7 | 76.4 <sup>j</sup> [5] | 31.82 <sup>j</sup> [5] | 2000 | 0.1  | 6.52 | 5.00E-07 | 2.55E+00 |
| 221 | Co | 2 | 0.745 | 1.7 | 76.4 <sup>j</sup> [5] | 31.82 <sup>j</sup> [5] | 2000 | 0.1  | 6.77 | 5.00E-07 | 3.19E+00 |
| 222 | Co | 2 | 0.745 | 1.7 | 76.4 <sup>j</sup> [5] | 31.82 <sup>j</sup> [5] | 2000 | 0.1  | 6.91 | 5.00E-07 | 4.06E+00 |

|     |    |   |       |      |                       |                        |      |       |      |          |          |
|-----|----|---|-------|------|-----------------------|------------------------|------|-------|------|----------|----------|
| 223 | Co | 2 | 0.745 | 1.7  | 76.4 <sup>j</sup> [5] | 31.82 <sup>j</sup> [5] | 2000 | 0.1   | 7.05 | 5.00E-07 | 4.42E+00 |
| 224 | Co | 2 | 0.745 | 1.7  | 76.4 <sup>j</sup> [5] | 31.82 <sup>j</sup> [5] | 2000 | 0.1   | 7.41 | 5.00E-07 | 6.73E+00 |
| 225 | Ni | 2 | 0.69  | 1.75 | 76.4 <sup>j</sup> [5] | 31.82 <sup>j</sup> [5] | 2000 | 0.001 | 3.06 | 5.00E-05 | 2.41E+00 |
| 226 | Ni | 2 | 0.69  | 1.75 | 76.4 <sup>j</sup> [5] | 31.82 <sup>j</sup> [5] | 2000 | 0.001 | 3.66 | 5.00E-05 | 2.72E+00 |
| 227 | Ni | 2 | 0.69  | 1.75 | 76.4 <sup>j</sup> [5] | 31.82 <sup>j</sup> [5] | 2000 | 0.001 | 4.11 | 5.00E-05 | 3.09E+00 |
| 228 | Ni | 2 | 0.69  | 1.75 | 76.4 <sup>j</sup> [5] | 31.82 <sup>j</sup> [5] | 2000 | 0.001 | 4.53 | 5.00E-05 | 3.04E+00 |
| 229 | Ni | 2 | 0.69  | 1.75 | 76.4 <sup>j</sup> [5] | 31.82 <sup>j</sup> [5] | 2000 | 0.001 | 4.66 | 5.00E-05 | 3.14E+00 |
| 230 | Ni | 2 | 0.69  | 1.75 | 76.4 <sup>j</sup> [5] | 31.82 <sup>j</sup> [5] | 2000 | 0.001 | 5.31 | 5.00E-05 | 3.37E+00 |
| 231 | Ni | 2 | 0.69  | 1.75 | 76.4 <sup>j</sup> [5] | 31.82 <sup>j</sup> [5] | 2000 | 0.001 | 5.71 | 5.00E-05 | 3.76E+00 |
| 232 | Ni | 2 | 0.69  | 1.75 | 76.4 <sup>j</sup> [5] | 31.82 <sup>j</sup> [5] | 2000 | 0.001 | 6.16 | 5.00E-05 | 4.13E+00 |
| 233 | Ni | 2 | 0.69  | 1.75 | 76.4 <sup>j</sup> [5] | 31.82 <sup>j</sup> [5] | 2000 | 0.001 | 6.39 | 5.00E-05 | 4.29E+00 |
| 234 | Ni | 2 | 0.69  | 1.75 | 76.4 <sup>j</sup> [5] | 31.82 <sup>j</sup> [5] | 2000 | 0.001 | 6.57 | 5.00E-05 | 4.73E+00 |
| 235 | Ni | 2 | 0.69  | 1.75 | 76.4 <sup>j</sup> [5] | 31.82 <sup>j</sup> [5] | 2000 | 0.001 | 6.8  | 5.00E-05 | 4.78E+00 |
| 236 | Ni | 2 | 0.69  | 1.75 | 76.4 <sup>j</sup> [5] | 31.82 <sup>j</sup> [5] | 2000 | 0.001 | 7.25 | 5.00E-05 | 5.70E+00 |
| 237 | Ni | 2 | 0.69  | 1.75 | 76.4 <sup>j</sup> [5] | 31.82 <sup>j</sup> [5] | 2000 | 0.001 | 7.61 | 5.00E-05 | 1.00E+01 |
| 238 | Ni | 2 | 0.69  | 1.75 | 76.4 <sup>j</sup> [5] | 31.82 <sup>j</sup> [5] | 2000 | 0.001 | 8.78 | 5.00E-05 | 4.18E+01 |
| 239 | Ni | 2 | 0.69  | 1.75 | 76.4 <sup>j</sup> [5] | 31.82 <sup>j</sup> [5] | 2000 | 0.001 | 9.71 | 5.00E-05 | 4.74E+02 |
| 240 | Ni | 2 | 0.69  | 1.75 | 76.4 <sup>j</sup> [5] | 31.82 <sup>j</sup> [5] | 2000 | 0.02  | 3.06 | 5.00E-05 | 4.60E-01 |
| 241 | Ni | 2 | 0.69  | 1.75 | 76.4 <sup>j</sup> [5] | 31.82 <sup>j</sup> [5] | 2000 | 0.02  | 3.54 | 5.00E-05 | 5.38E-01 |
| 242 | Ni | 2 | 0.69  | 1.75 | 76.4 <sup>j</sup> [5] | 31.82 <sup>j</sup> [5] | 2000 | 0.02  | 4.18 | 5.00E-05 | 5.45E-01 |
| 243 | Ni | 2 | 0.69  | 1.75 | 76.4 <sup>j</sup> [5] | 31.82 <sup>j</sup> [5] | 2000 | 0.02  | 4.37 | 5.00E-05 | 5.86E-01 |
| 244 | Ni | 2 | 0.69  | 1.75 | 76.4 <sup>j</sup> [5] | 31.82 <sup>j</sup> [5] | 2000 | 0.02  | 4.73 | 5.00E-05 | 6.28E-01 |
| 245 | Ni | 2 | 0.69  | 1.75 | 76.4 <sup>j</sup> [5] | 31.82 <sup>j</sup> [5] | 2000 | 0.02  | 5.68 | 5.00E-05 | 7.17E-01 |
| 246 | Ni | 2 | 0.69  | 1.75 | 76.4 <sup>j</sup> [5] | 31.82 <sup>j</sup> [5] | 2000 | 0.02  | 6.04 | 5.00E-05 | 7.33E-01 |
| 247 | Ni | 2 | 0.69  | 1.75 | 76.4 <sup>j</sup> [5] | 31.82 <sup>j</sup> [5] | 2000 | 0.02  | 6.46 | 5.00E-05 | 7.25E-01 |
| 248 | Ni | 2 | 0.69  | 1.75 | 76.4 <sup>j</sup> [5] | 31.82 <sup>j</sup> [5] | 2000 | 0.02  | 6.74 | 5.00E-05 | 7.96E-01 |
| 249 | Ni | 2 | 0.69  | 1.75 | 76.4 <sup>j</sup> [5] | 31.82 <sup>j</sup> [5] | 2000 | 0.02  | 6.93 | 5.00E-05 | 8.46E-01 |
| 250 | Ni | 2 | 0.69  | 1.75 | 76.4 <sup>j</sup> [5] | 31.82 <sup>j</sup> [5] | 2000 | 0.02  | 7.24 | 5.00E-05 | 1.24E+00 |
| 251 | Ni | 2 | 0.69  | 1.75 | 76.4 <sup>j</sup> [5] | 31.82 <sup>j</sup> [5] | 2000 | 0.02  | 8.01 | 5.00E-05 | 5.23E+00 |
| 252 | Ni | 2 | 0.69  | 1.75 | 76.4 <sup>j</sup> [5] | 31.82 <sup>j</sup> [5] | 2000 | 0.02  | 9.03 | 5.00E-05 | 3.37E+01 |
| 253 | Ni | 2 | 0.69  | 1.75 | 76.4 <sup>j</sup> [5] | 31.82 <sup>j</sup> [5] | 2000 | 0.02  | 9.8  | 5.00E-05 | 5.15E+01 |
| 254 | Ni | 2 | 0.69  | 1.75 | 76.4 <sup>j</sup> [5] | 31.82 <sup>j</sup> [5] | 2000 | 0.1   | 4.11 | 5.00E-05 | 2.10E-02 |
| 255 | Ni | 2 | 0.69  | 1.75 | 76.4 <sup>j</sup> [5] | 31.82 <sup>j</sup> [5] | 2000 | 0.1   | 4.5  | 5.00E-05 | 1.05E-01 |
| 256 | Ni | 2 | 0.69  | 1.75 | 76.4 <sup>j</sup> [5] | 31.82 <sup>j</sup> [5] | 2000 | 0.1   | 4.81 | 5.00E-05 | 1.86E-01 |
| 257 | Ni | 2 | 0.69  | 1.75 | 76.4 <sup>j</sup> [5] | 31.82 <sup>j</sup> [5] | 2000 | 0.1   | 5.24 | 5.00E-05 | 6.72E-01 |
| 258 | Ni | 2 | 0.69  | 1.75 | 76.4 <sup>j</sup> [5] | 31.82 <sup>j</sup> [5] | 2000 | 0.1   | 5.65 | 5.00E-05 | 6.95E-01 |
| 259 | Ni | 2 | 0.69  | 1.75 | 76.4 <sup>j</sup> [5] | 31.82 <sup>j</sup> [5] | 2000 | 0.1   | 6.2  | 5.00E-05 | 1.43E-01 |
| 260 | Ni | 2 | 0.69  | 1.75 | 76.4 <sup>j</sup> [5] | 31.82 <sup>j</sup> [5] | 2000 | 0.1   | 6.35 | 5.00E-05 | 3.01E-01 |
| 261 | Ni | 2 | 0.69  | 1.75 | 76.4 <sup>j</sup> [5] | 31.82 <sup>j</sup> [5] | 2000 | 0.1   | 6.54 | 5.00E-05 | 5.12E-01 |
| 262 | Ni | 2 | 0.69  | 1.75 | 76.4 <sup>j</sup> [5] | 31.82 <sup>j</sup> [5] | 2000 | 0.1   | 6.92 | 5.00E-05 | 1.02E+00 |
| 263 | Ni | 2 | 0.69  | 1.75 | 76.4 <sup>j</sup> [5] | 31.82 <sup>j</sup> [5] | 2000 | 0.1   | 7.29 | 5.00E-05 | 1.06E+00 |
| 264 | Ni | 2 | 0.69  | 1.75 | 76.4 <sup>j</sup> [5] | 31.82 <sup>j</sup> [5] | 2000 | 0.1   | 7.56 | 5.00E-05 | 3.29E+00 |
| 265 | Ni | 2 | 0.69  | 1.75 | 76.4 <sup>j</sup> [5] | 31.82 <sup>j</sup> [5] | 2000 | 0.1   | 8.92 | 5.00E-05 | 1.35E+02 |
| 266 | Ni | 2 | 0.69  | 1.75 | 76.4 <sup>j</sup> [5] | 31.82 <sup>j</sup> [5] | 2000 | 0.1   | 9.8  | 5.00E-05 | 4.74E+02 |
| 267 | Ni | 2 | 0.69  | 1.75 | 76.4 <sup>j</sup> [5] | 31.82 <sup>j</sup> [5] | 2000 | 0.02  | 3.06 | 5.00E-06 | 2.37E-01 |

|     |    |   |      |      |                       |                        |      |       |      |          |          |
|-----|----|---|------|------|-----------------------|------------------------|------|-------|------|----------|----------|
| 268 | Ni | 2 | 0.69 | 1.75 | 76.4 <sup>j</sup> [5] | 31.82 <sup>j</sup> [5] | 2000 | 0.02  | 3.73 | 5.00E-06 | 4.17E-01 |
| 269 | Ni | 2 | 0.69 | 1.75 | 76.4 <sup>j</sup> [5] | 31.82 <sup>j</sup> [5] | 2000 | 0.02  | 4.27 | 5.00E-06 | 4.05E-01 |
| 270 | Ni | 2 | 0.69 | 1.75 | 76.4 <sup>j</sup> [5] | 31.82 <sup>j</sup> [5] | 2000 | 0.02  | 5.04 | 5.00E-06 | 5.05E-01 |
| 271 | Ni | 2 | 0.69 | 1.75 | 76.4 <sup>j</sup> [5] | 31.82 <sup>j</sup> [5] | 2000 | 0.02  | 5.36 | 5.00E-06 | 4.92E-01 |
| 272 | Ni | 2 | 0.69 | 1.75 | 76.4 <sup>j</sup> [5] | 31.82 <sup>j</sup> [5] | 2000 | 0.02  | 5.93 | 5.00E-06 | 5.86E-01 |
| 273 | Ni | 2 | 0.69 | 1.75 | 76.4 <sup>j</sup> [5] | 31.82 <sup>j</sup> [5] | 2000 | 0.02  | 6.2  | 5.00E-06 | 7.88E-01 |
| 274 | Ni | 2 | 0.69 | 1.75 | 76.4 <sup>j</sup> [5] | 31.82 <sup>j</sup> [5] | 2000 | 0.02  | 6.44 | 5.00E-06 | 7.96E-01 |
| 275 | Ni | 2 | 0.69 | 1.75 | 76.4 <sup>j</sup> [5] | 31.82 <sup>j</sup> [5] | 2000 | 0.02  | 6.64 | 5.00E-06 | 7.72E-01 |
| 276 | Ni | 2 | 0.69 | 1.75 | 76.4 <sup>j</sup> [5] | 31.82 <sup>j</sup> [5] | 2000 | 0.02  | 7.15 | 5.00E-06 | 1.10E+00 |
| 277 | Ni | 2 | 0.69 | 1.75 | 76.4 <sup>j</sup> [5] | 31.82 <sup>j</sup> [5] | 2000 | 0.02  | 8.88 | 5.00E-06 | 3.83E+00 |
| 278 | Ni | 2 | 0.69 | 1.75 | 76.4 <sup>j</sup> [5] | 31.82 <sup>j</sup> [5] | 2000 | 0.02  | 9.9  | 5.00E-06 | 6.51E+00 |
| 279 | Ni | 2 | 0.69 | 1.75 | 76.4 <sup>j</sup> [5] | 31.82 <sup>j</sup> [5] | 2000 | 0.1   | 3    | 5.00E-06 | 5.86E-01 |
| 280 | Ni | 2 | 0.69 | 1.75 | 76.4 <sup>j</sup> [5] | 31.82 <sup>j</sup> [5] | 2000 | 0.1   | 4.16 | 5.00E-06 | 6.95E-01 |
| 281 | Ni | 2 | 0.69 | 1.75 | 76.4 <sup>j</sup> [5] | 31.82 <sup>j</sup> [5] | 2000 | 0.1   | 4.62 | 5.00E-06 | 9.15E-01 |
| 282 | Ni | 2 | 0.69 | 1.75 | 76.4 <sup>j</sup> [5] | 31.82 <sup>j</sup> [5] | 2000 | 0.1   | 4.94 | 5.00E-06 | 1.36E+00 |
| 283 | Ni | 2 | 0.69 | 1.75 | 76.4 <sup>j</sup> [5] | 31.82 <sup>j</sup> [5] | 2000 | 0.1   | 5.68 | 5.00E-06 | 1.39E+00 |
| 284 | Ni | 2 | 0.69 | 1.75 | 76.4 <sup>j</sup> [5] | 31.82 <sup>j</sup> [5] | 2000 | 0.1   | 6.09 | 5.00E-06 | 1.96E+00 |
| 285 | Ni | 2 | 0.69 | 1.75 | 76.4 <sup>j</sup> [5] | 31.82 <sup>j</sup> [5] | 2000 | 0.1   | 6.36 | 5.00E-06 | 1.71E+00 |
| 286 | Ni | 2 | 0.69 | 1.75 | 76.4 <sup>j</sup> [5] | 31.82 <sup>j</sup> [5] | 2000 | 0.1   | 6.54 | 5.00E-06 | 2.20E+00 |
| 287 | Ni | 2 | 0.69 | 1.75 | 76.4 <sup>j</sup> [5] | 31.82 <sup>j</sup> [5] | 2000 | 0.1   | 6.78 | 5.00E-06 | 1.88E+00 |
| 288 | Ni | 2 | 0.69 | 1.75 | 76.4 <sup>j</sup> [5] | 31.82 <sup>j</sup> [5] | 2000 | 0.1   | 6.94 | 5.00E-06 | 1.70E+00 |
| 289 | Ni | 2 | 0.69 | 1.75 | 76.4 <sup>j</sup> [5] | 31.82 <sup>j</sup> [5] | 2000 | 0.1   | 7.02 | 5.00E-06 | 2.06E+00 |
| 290 | Ni | 2 | 0.69 | 1.75 | 76.4 <sup>j</sup> [5] | 31.82 <sup>j</sup> [5] | 2000 | 0.1   | 7.35 | 5.00E-06 | 3.83E+00 |
| 291 | Ni | 2 | 0.69 | 1.75 | 76.4 <sup>j</sup> [5] | 31.82 <sup>j</sup> [5] | 2000 | 0.1   | 9.19 | 5.00E-06 | 3.81E+01 |
| 292 | Ni | 2 | 0.69 | 1.75 | 76.4 <sup>j</sup> [5] | 31.82 <sup>j</sup> [5] | 2000 | 0.1   | 9.96 | 5.00E-06 | 1.90E+02 |
| 293 | Ni | 2 | 0.69 | 1.75 | 76.4 <sup>j</sup> [5] | 31.82 <sup>j</sup> [5] | 2000 | 0.1   | 3.06 | 5.00E-07 | 3.52E-01 |
| 294 | Ni | 2 | 0.69 | 1.75 | 76.4 <sup>j</sup> [5] | 31.82 <sup>j</sup> [5] | 2000 | 0.1   | 3.61 | 5.00E-07 | 6.21E-01 |
| 295 | Ni | 2 | 0.69 | 1.75 | 76.4 <sup>j</sup> [5] | 31.82 <sup>j</sup> [5] | 2000 | 0.1   | 4.22 | 5.00E-07 | 4.79E-01 |
| 296 | Ni | 2 | 0.69 | 1.75 | 76.4 <sup>j</sup> [5] | 31.82 <sup>j</sup> [5] | 2000 | 0.1   | 4.59 | 5.00E-07 | 5.25E-01 |
| 297 | Ni | 2 | 0.69 | 1.75 | 76.4 <sup>j</sup> [5] | 31.82 <sup>j</sup> [5] | 2000 | 0.1   | 5.14 | 5.00E-07 | 6.28E-01 |
| 298 | Ni | 2 | 0.69 | 1.75 | 76.4 <sup>j</sup> [5] | 31.82 <sup>j</sup> [5] | 2000 | 0.1   | 5.61 | 5.00E-07 | 6.21E-01 |
| 299 | Ni | 2 | 0.69 | 1.75 | 76.4 <sup>j</sup> [5] | 31.82 <sup>j</sup> [5] | 2000 | 0.1   | 5.9  | 5.00E-07 | 7.56E-01 |
| 300 | Ni | 2 | 0.69 | 1.75 | 76.4 <sup>j</sup> [5] | 31.82 <sup>j</sup> [5] | 2000 | 0.1   | 6.29 | 5.00E-07 | 7.80E-01 |
| 301 | Ni | 2 | 0.69 | 1.75 | 76.4 <sup>j</sup> [5] | 31.82 <sup>j</sup> [5] | 2000 | 0.1   | 6.65 | 5.00E-07 | 8.55E-01 |
| 302 | Ni | 2 | 0.69 | 1.75 | 76.4 <sup>j</sup> [5] | 31.82 <sup>j</sup> [5] | 2000 | 0.1   | 6.84 | 5.00E-07 | 9.42E-01 |
| 303 | Ni | 2 | 0.69 | 1.75 | 76.4 <sup>j</sup> [5] | 31.82 <sup>j</sup> [5] | 2000 | 0.1   | 7.02 | 5.00E-07 | 1.89E+00 |
| 304 | Ni | 2 | 0.69 | 1.75 | 76.4 <sup>j</sup> [5] | 31.82 <sup>j</sup> [5] | 2000 | 0.1   | 7.16 | 5.00E-07 | 1.51E+00 |
| 305 | Ni | 2 | 0.69 | 1.75 | 76.4 <sup>j</sup> [5] | 31.82 <sup>j</sup> [5] | 2000 | 0.1   | 7.58 | 5.00E-07 | 1.11E+00 |
| 306 | Ni | 2 | 0.69 | 1.75 | 76.4 <sup>j</sup> [5] | 31.82 <sup>j</sup> [5] | 2000 | 0.1   | 8.44 | 5.00E-07 | 2.86E+00 |
| 307 | Ni | 2 | 0.69 | 1.75 | 76.4 <sup>j</sup> [5] | 31.82 <sup>j</sup> [5] | 2000 | 0.1   | 9.23 | 5.00E-07 | 6.15E+00 |
| 308 | Ni | 2 | 0.69 | 1.75 | 76.4 <sup>j</sup> [5] | 31.82 <sup>j</sup> [5] | 2000 | 0.1   | 10   | 5.00E-07 | 7.52E+00 |
| 309 | Pb | 2 | 1.19 | 1.55 | 76.4 <sup>j</sup> [5] | 31.82 <sup>j</sup> [5] | 2000 | 0.001 | 3.07 | 5.00E-05 | 2.02E+00 |
| 310 | Pb | 2 | 1.19 | 1.55 | 76.4 <sup>j</sup> [5] | 31.82 <sup>j</sup> [5] | 2000 | 0.001 | 3.58 | 5.00E-05 | 2.21E+00 |
| 311 | Pb | 2 | 1.19 | 1.55 | 76.4 <sup>j</sup> [5] | 31.82 <sup>j</sup> [5] | 2000 | 0.001 | 4.06 | 5.00E-05 | 2.50E+00 |
| 312 | Pb | 2 | 1.19 | 1.55 | 76.4 <sup>j</sup> [5] | 31.82 <sup>j</sup> [5] | 2000 | 0.001 | 4.37 | 5.00E-05 | 2.44E+00 |



|     |    |   |      |      |                       |                        |      |       |      |          |          |
|-----|----|---|------|------|-----------------------|------------------------|------|-------|------|----------|----------|
| 313 | Pb | 2 | 1.19 | 1.55 | 76.4 <sup>j</sup> [5] | 31.82 <sup>j</sup> [5] | 2000 | 0.001 | 4.78 | 5.00E-05 | 2.99E+00 |
| 314 | Pb | 2 | 1.19 | 1.55 | 76.4 <sup>j</sup> [5] | 31.82 <sup>j</sup> [5] | 2000 | 0.001 | 5.86 | 5.00E-05 | 4.89E+00 |
| 315 | Pb | 2 | 1.19 | 1.55 | 76.4 <sup>j</sup> [5] | 31.82 <sup>j</sup> [5] | 2000 | 0.001 | 6.4  | 5.00E-05 | 6.31E+00 |
| 316 | Pb | 2 | 1.19 | 1.55 | 76.4 <sup>j</sup> [5] | 31.82 <sup>j</sup> [5] | 2000 | 0.001 | 6.62 | 5.00E-05 | 8.72E+00 |
| 317 | Pb | 2 | 1.19 | 1.55 | 76.4 <sup>j</sup> [5] | 31.82 <sup>j</sup> [5] | 2000 | 0.001 | 6.92 | 5.00E-05 | 1.53E+01 |
| 318 | Pb | 2 | 1.19 | 1.55 | 76.4 <sup>j</sup> [5] | 31.82 <sup>j</sup> [5] | 2000 | 0.001 | 7.15 | 5.00E-05 | 2.29E+01 |
| 319 | Pb | 2 | 1.19 | 1.55 | 76.4 <sup>j</sup> [5] | 31.82 <sup>j</sup> [5] | 2000 | 0.001 | 7.41 | 5.00E-05 | 2.93E+01 |
| 320 | Pb | 2 | 1.19 | 1.55 | 76.4 <sup>j</sup> [5] | 31.82 <sup>j</sup> [5] | 2000 | 0.001 | 7.93 | 5.00E-05 | 1.41E+02 |
| 321 | Pb | 2 | 1.19 | 1.55 | 76.4 <sup>j</sup> [5] | 31.82 <sup>j</sup> [5] | 2000 | 0.001 | 9.24 | 5.00E-05 | 2.45E+02 |
| 322 | Pb | 2 | 1.19 | 1.55 | 76.4 <sup>j</sup> [5] | 31.82 <sup>j</sup> [5] | 2000 | 0.001 | 9.91 | 5.00E-05 | 3.21E+02 |
| 323 | Pb | 2 | 1.19 | 1.55 | 76.4 <sup>j</sup> [5] | 31.82 <sup>j</sup> [5] | 2000 | 0.02  | 3.14 | 5.00E-05 | 1.65E+00 |
| 324 | Pb | 2 | 1.19 | 1.55 | 76.4 <sup>j</sup> [5] | 31.82 <sup>j</sup> [5] | 2000 | 0.02  | 3.63 | 5.00E-05 | 1.38E+00 |
| 325 | Pb | 2 | 1.19 | 1.55 | 76.4 <sup>j</sup> [5] | 31.82 <sup>j</sup> [5] | 2000 | 0.02  | 3.99 | 5.00E-05 | 1.44E+00 |
| 326 | Pb | 2 | 1.19 | 1.55 | 76.4 <sup>j</sup> [5] | 31.82 <sup>j</sup> [5] | 2000 | 0.02  | 4.35 | 5.00E-05 | 1.66E+00 |
| 327 | Pb | 2 | 1.19 | 1.55 | 76.4 <sup>j</sup> [5] | 31.82 <sup>j</sup> [5] | 2000 | 0.02  | 4.69 | 5.00E-05 | 1.78E+00 |
| 328 | Pb | 2 | 1.19 | 1.55 | 76.4 <sup>j</sup> [5] | 31.82 <sup>j</sup> [5] | 2000 | 0.02  | 5.14 | 5.00E-05 | 1.81E+00 |
| 329 | Pb | 2 | 1.19 | 1.55 | 76.4 <sup>j</sup> [5] | 31.82 <sup>j</sup> [5] | 2000 | 0.02  | 5.73 | 5.00E-05 | 2.32E+00 |
| 330 | Pb | 2 | 1.19 | 1.55 | 76.4 <sup>j</sup> [5] | 31.82 <sup>j</sup> [5] | 2000 | 0.02  | 6.33 | 5.00E-05 | 3.38E+00 |
| 331 | Pb | 2 | 1.19 | 1.55 | 76.4 <sup>j</sup> [5] | 31.82 <sup>j</sup> [5] | 2000 | 0.02  | 6.72 | 5.00E-05 | 4.69E+00 |
| 332 | Pb | 2 | 1.19 | 1.55 | 76.4 <sup>j</sup> [5] | 31.82 <sup>j</sup> [5] | 2000 | 0.02  | 6.91 | 5.00E-05 | 7.45E+00 |
| 333 | Pb | 2 | 1.19 | 1.55 | 76.4 <sup>j</sup> [5] | 31.82 <sup>j</sup> [5] | 2000 | 0.02  | 7.84 | 5.00E-05 | 2.57E+01 |
| 334 | Pb | 2 | 1.19 | 1.55 | 76.4 <sup>j</sup> [5] | 31.82 <sup>j</sup> [5] | 2000 | 0.02  | 8.04 | 5.00E-05 | 8.77E+01 |
| 335 | Pb | 2 | 1.19 | 1.55 | 76.4 <sup>j</sup> [5] | 31.82 <sup>j</sup> [5] | 2000 | 0.02  | 9.17 | 5.00E-05 | 1.20E+02 |
| 336 | Pb | 2 | 1.19 | 1.55 | 76.4 <sup>j</sup> [5] | 31.82 <sup>j</sup> [5] | 2000 | 0.02  | 9.83 | 5.00E-05 | 1.90E+02 |
| 337 | Pb | 2 | 1.19 | 1.55 | 76.4 <sup>j</sup> [5] | 31.82 <sup>j</sup> [5] | 2000 | 0.1   | 3.95 | 5.00E-05 | 1.37E-01 |
| 338 | Pb | 2 | 1.19 | 1.55 | 76.4 <sup>j</sup> [5] | 31.82 <sup>j</sup> [5] | 2000 | 0.1   | 5.06 | 5.00E-05 | 2.63E-01 |
| 339 | Pb | 2 | 1.19 | 1.55 | 76.4 <sup>j</sup> [5] | 31.82 <sup>j</sup> [5] | 2000 | 0.1   | 5.63 | 5.00E-05 | 4.22E-01 |
| 340 | Pb | 2 | 1.19 | 1.55 | 76.4 <sup>j</sup> [5] | 31.82 <sup>j</sup> [5] | 2000 | 0.1   | 6.28 | 5.00E-05 | 4.65E-01 |
| 341 | Pb | 2 | 1.19 | 1.55 | 76.4 <sup>j</sup> [5] | 31.82 <sup>j</sup> [5] | 2000 | 0.1   | 6.73 | 5.00E-05 | 1.19E+00 |
| 342 | Pb | 2 | 1.19 | 1.55 | 76.4 <sup>j</sup> [5] | 31.82 <sup>j</sup> [5] | 2000 | 0.1   | 6.99 | 5.00E-05 | 8.05E+00 |
| 343 | Pb | 2 | 1.19 | 1.55 | 76.4 <sup>j</sup> [5] | 31.82 <sup>j</sup> [5] | 2000 | 0.1   | 7.16 | 5.00E-05 | 1.41E+01 |
| 344 | Pb | 2 | 1.19 | 1.55 | 76.4 <sup>j</sup> [5] | 31.82 <sup>j</sup> [5] | 2000 | 0.1   | 7.63 | 5.00E-05 | 2.83E+01 |
| 345 | Pb | 2 | 1.19 | 1.55 | 76.4 <sup>j</sup> [5] | 31.82 <sup>j</sup> [5] | 2000 | 0.1   | 8.66 | 5.00E-05 | 8.69E+01 |
| 346 | Pb | 2 | 1.19 | 1.55 | 76.4 <sup>j</sup> [5] | 31.82 <sup>j</sup> [5] | 2000 | 0.1   | 9.24 | 5.00E-05 | 7.86E+01 |
| 347 | Pb | 2 | 1.19 | 1.55 | 76.4 <sup>j</sup> [5] | 31.82 <sup>j</sup> [5] | 2000 | 0.02  | 3.06 | 5.00E-06 | 6.97E-01 |
| 348 | Pb | 2 | 1.19 | 1.55 | 76.4 <sup>j</sup> [5] | 31.82 <sup>j</sup> [5] | 2000 | 0.02  | 3.59 | 5.00E-06 | 9.53E-01 |
| 349 | Pb | 2 | 1.19 | 1.55 | 76.4 <sup>j</sup> [5] | 31.82 <sup>j</sup> [5] | 2000 | 0.02  | 4.12 | 5.00E-06 | 1.29E+00 |
| 350 | Pb | 2 | 1.19 | 1.55 | 76.4 <sup>j</sup> [5] | 31.82 <sup>j</sup> [5] | 2000 | 0.02  | 4.51 | 5.00E-06 | 1.63E+00 |
| 351 | Pb | 2 | 1.19 | 1.55 | 76.4 <sup>j</sup> [5] | 31.82 <sup>j</sup> [5] | 2000 | 0.02  | 5.04 | 5.00E-06 | 2.50E+00 |
| 352 | Pb | 2 | 1.19 | 1.55 | 76.4 <sup>j</sup> [5] | 31.82 <sup>j</sup> [5] | 2000 | 0.02  | 5.3  | 5.00E-06 | 3.38E+00 |
| 353 | Pb | 2 | 1.19 | 1.55 | 76.4 <sup>j</sup> [5] | 31.82 <sup>j</sup> [5] | 2000 | 0.02  | 5.64 | 5.00E-06 | 7.96E+00 |
| 354 | Pb | 2 | 1.19 | 1.55 | 76.4 <sup>j</sup> [5] | 31.82 <sup>j</sup> [5] | 2000 | 0.02  | 6.08 | 5.00E-06 | 1.82E+01 |
| 355 | Pb | 2 | 1.19 | 1.55 | 76.4 <sup>j</sup> [5] | 31.82 <sup>j</sup> [5] | 2000 | 0.02  | 6.21 | 5.00E-06 | 3.72E+01 |
| 356 | Pb | 2 | 1.19 | 1.55 | 76.4 <sup>j</sup> [5] | 31.82 <sup>j</sup> [5] | 2000 | 0.02  | 6.6  | 5.00E-06 | 1.25E+02 |
| 357 | Pb | 2 | 1.19 | 1.55 | 76.4 <sup>j</sup> [5] | 31.82 <sup>j</sup> [5] | 2000 | 0.02  | 6.96 | 5.00E-06 | 2.09E+02 |

|     |    |   |      |      |                       |                        |      |       |      |          |          |
|-----|----|---|------|------|-----------------------|------------------------|------|-------|------|----------|----------|
| 358 | Pb | 2 | 1.19 | 1.55 | 76.4 <sup>j</sup> [5] | 31.82 <sup>j</sup> [5] | 2000 | 0.1   | 2.99 | 5.00E-06 | 4.26E-02 |
| 359 | Pb | 2 | 1.19 | 1.55 | 76.4 <sup>j</sup> [5] | 31.82 <sup>j</sup> [5] | 2000 | 0.1   | 3.37 | 5.00E-06 | 1.33E-01 |
| 360 | Pb | 2 | 1.19 | 1.55 | 76.4 <sup>j</sup> [5] | 31.82 <sup>j</sup> [5] | 2000 | 0.1   | 3.63 | 5.00E-06 | 1.57E-01 |
| 361 | Pb | 2 | 1.19 | 1.55 | 76.4 <sup>j</sup> [5] | 31.82 <sup>j</sup> [5] | 2000 | 0.1   | 3.94 | 5.00E-06 | 1.62E-01 |
| 362 | Pb | 2 | 1.19 | 1.55 | 76.4 <sup>j</sup> [5] | 31.82 <sup>j</sup> [5] | 2000 | 0.1   | 4.29 | 5.00E-06 | 2.47E-01 |
| 363 | Pb | 2 | 1.19 | 1.55 | 76.4 <sup>j</sup> [5] | 31.82 <sup>j</sup> [5] | 2000 | 0.1   | 4.67 | 5.00E-06 | 3.63E-01 |
| 364 | Pb | 2 | 1.19 | 1.55 | 76.4 <sup>j</sup> [5] | 31.82 <sup>j</sup> [5] | 2000 | 0.1   | 4.98 | 5.00E-06 | 5.65E-01 |
| 365 | Pb | 2 | 1.19 | 1.55 | 76.4 <sup>j</sup> [5] | 31.82 <sup>j</sup> [5] | 2000 | 0.1   | 5.27 | 5.00E-06 | 1.27E+00 |
| 366 | Pb | 2 | 1.19 | 1.55 | 76.4 <sup>j</sup> [5] | 31.82 <sup>j</sup> [5] | 2000 | 0.1   | 5.48 | 5.00E-06 | 1.29E+00 |
| 367 | Pb | 2 | 1.19 | 1.55 | 76.4 <sup>j</sup> [5] | 31.82 <sup>j</sup> [5] | 2000 | 0.1   | 5.64 | 5.00E-06 | 1.64E+00 |
| 368 | Pb | 2 | 1.19 | 1.55 | 76.4 <sup>j</sup> [5] | 31.82 <sup>j</sup> [5] | 2000 | 0.1   | 5.86 | 5.00E-06 | 3.38E+00 |
| 369 | Pb | 2 | 1.19 | 1.55 | 76.4 <sup>j</sup> [5] | 31.82 <sup>j</sup> [5] | 2000 | 0.1   | 6.22 | 5.00E-06 | 3.38E+00 |
| 370 | Pb | 2 | 1.19 | 1.55 | 76.4 <sup>j</sup> [5] | 31.82 <sup>j</sup> [5] | 2000 | 0.1   | 6.31 | 5.00E-06 | 6.69E+00 |
| 371 | Pb | 2 | 1.19 | 1.55 | 76.4 <sup>j</sup> [5] | 31.82 <sup>j</sup> [5] | 2000 | 0.1   | 6.39 | 5.00E-06 | 1.27E+01 |
| 372 | Pb | 2 | 1.19 | 1.55 | 76.4 <sup>j</sup> [5] | 31.82 <sup>j</sup> [5] | 2000 | 0.1   | 6.75 | 5.00E-06 | 8.60E+00 |
| 373 | Pb | 2 | 1.19 | 1.55 | 76.4 <sup>j</sup> [5] | 31.82 <sup>j</sup> [5] | 2000 | 0.1   | 6.93 | 5.00E-06 | 5.97E+01 |
| 374 | Pb | 2 | 1.19 | 1.55 | 76.4 <sup>j</sup> [5] | 31.82 <sup>j</sup> [5] | 2000 | 0.1   | 7.68 | 5.00E-06 | 3.27E+01 |
| 375 | Pb | 2 | 1.19 | 1.55 | 76.4 <sup>j</sup> [5] | 31.82 <sup>j</sup> [5] | 2000 | 0.1   | 4.53 | 5.00E-07 | 1.38E-01 |
| 376 | Pb | 2 | 1.19 | 1.55 | 76.4 <sup>j</sup> [5] | 31.82 <sup>j</sup> [5] | 2000 | 0.1   | 4.83 | 5.00E-07 | 5.07E-01 |
| 377 | Pb | 2 | 1.19 | 1.55 | 76.4 <sup>j</sup> [5] | 31.82 <sup>j</sup> [5] | 2000 | 0.1   | 4.93 | 5.00E-07 | 2.40E+00 |
| 378 | Pb | 2 | 1.19 | 1.55 | 76.4 <sup>j</sup> [5] | 31.82 <sup>j</sup> [5] | 2000 | 0.1   | 5.38 | 5.00E-07 | 3.45E+00 |
| 379 | Pb | 2 | 1.19 | 1.55 | 76.4 <sup>j</sup> [5] | 31.82 <sup>j</sup> [5] | 2000 | 0.1   | 5.43 | 5.00E-07 | 1.79E+00 |
| 380 | Pb | 2 | 1.19 | 1.55 | 76.4 <sup>j</sup> [5] | 31.82 <sup>j</sup> [5] | 2000 | 0.1   | 6.04 | 5.00E-07 | 1.25E+01 |
| 381 | Pb | 2 | 1.19 | 1.55 | 76.4 <sup>j</sup> [5] | 31.82 <sup>j</sup> [5] | 2000 | 0.1   | 6.12 | 5.00E-07 | 6.89E+00 |
| 382 | Pb | 2 | 1.19 | 1.55 | 76.4 <sup>j</sup> [5] | 31.82 <sup>j</sup> [5] | 2000 | 0.1   | 6.24 | 5.00E-07 | 5.68E+00 |
| 383 | Pb | 2 | 1.19 | 1.55 | 76.4 <sup>j</sup> [5] | 31.82 <sup>j</sup> [5] | 2000 | 0.1   | 6.54 | 5.00E-07 | 2.54E+01 |
| 384 | Pb | 2 | 1.19 | 1.55 | 76.4 <sup>j</sup> [5] | 31.82 <sup>j</sup> [5] | 2000 | 0.1   | 6.72 | 5.00E-07 | 2.33E+01 |
| 385 | Pb | 2 | 1.19 | 1.55 | 76.4 <sup>j</sup> [5] | 31.82 <sup>j</sup> [5] | 2000 | 0.1   | 6.75 | 5.00E-07 | 1.10E+01 |
| 386 | Pb | 2 | 1.19 | 1.55 | 76.4 <sup>j</sup> [5] | 31.82 <sup>j</sup> [5] | 2000 | 0.1   | 6.98 | 5.00E-07 | 2.47E+01 |
| 387 | Pb | 2 | 1.19 | 1.55 | 76.4 <sup>j</sup> [5] | 31.82 <sup>j</sup> [5] | 2000 | 0.1   | 7.97 | 5.00E-07 | 5.80E+00 |
| 388 | Pb | 2 | 1.19 | 1.55 | 76.4 <sup>j</sup> [5] | 31.82 <sup>j</sup> [5] | 2000 | 0.1   | 9.23 | 5.00E-07 | 3.00E+01 |
| 389 | Cu | 2 | 0.73 | 1.75 | 76.4 <sup>j</sup> [5] | 31.82 <sup>j</sup> [5] | 2000 | 0.001 | 3.02 | 5.00E-05 | 2.39E+00 |
| 390 | Cu | 2 | 0.73 | 1.75 | 76.4 <sup>j</sup> [5] | 31.82 <sup>j</sup> [5] | 2000 | 0.001 | 3.63 | 5.00E-05 | 2.61E+00 |
| 391 | Cu | 2 | 0.73 | 1.75 | 76.4 <sup>j</sup> [5] | 31.82 <sup>j</sup> [5] | 2000 | 0.001 | 4.14 | 5.00E-05 | 2.91E+00 |
| 392 | Cu | 2 | 0.73 | 1.75 | 76.4 <sup>j</sup> [5] | 31.82 <sup>j</sup> [5] | 2000 | 0.001 | 4.33 | 5.00E-05 | 3.11E+00 |
| 393 | Cu | 2 | 0.73 | 1.75 | 76.4 <sup>j</sup> [5] | 31.82 <sup>j</sup> [5] | 2000 | 0.001 | 4.76 | 5.00E-05 | 3.53E+00 |
| 394 | Cu | 2 | 0.73 | 1.75 | 76.4 <sup>j</sup> [5] | 31.82 <sup>j</sup> [5] | 2000 | 0.001 | 5.11 | 5.00E-05 | 3.93E+00 |
| 395 | Cu | 2 | 0.73 | 1.75 | 76.4 <sup>j</sup> [5] | 31.82 <sup>j</sup> [5] | 2000 | 0.001 | 5.74 | 5.00E-05 | 5.12E+00 |
| 396 | Cu | 2 | 0.73 | 1.75 | 76.4 <sup>j</sup> [5] | 31.82 <sup>j</sup> [5] | 2000 | 0.001 | 6.27 | 5.00E-05 | 7.59E+00 |
| 397 | Cu | 2 | 0.73 | 1.75 | 76.4 <sup>j</sup> [5] | 31.82 <sup>j</sup> [5] | 2000 | 0.001 | 6.83 | 5.00E-05 | 2.51E+01 |
| 398 | Cu | 2 | 0.73 | 1.75 | 76.4 <sup>j</sup> [5] | 31.82 <sup>j</sup> [5] | 2000 | 0.001 | 7.03 | 5.00E-05 | 4.62E+01 |
| 399 | Cu | 2 | 0.73 | 1.75 | 76.4 <sup>j</sup> [5] | 31.82 <sup>j</sup> [5] | 2000 | 0.001 | 9.32 | 5.00E-05 | 1.42E+02 |
| 400 | Cu | 2 | 0.73 | 1.75 | 76.4 <sup>j</sup> [5] | 31.82 <sup>j</sup> [5] | 2000 | 0.02  | 3.12 | 5.00E-05 | 5.77E-01 |
| 401 | Cu | 2 | 0.73 | 1.75 | 76.4 <sup>j</sup> [5] | 31.82 <sup>j</sup> [5] | 2000 | 0.02  | 3.53 | 5.00E-05 | 6.38E-01 |
| 402 | Cu | 2 | 0.73 | 1.75 | 76.4 <sup>j</sup> [5] | 31.82 <sup>j</sup> [5] | 2000 | 0.02  | 4.06 | 5.00E-05 | 6.80E-01 |

|     |    |   |      |      |                       |                        |      |      |      |          |          |
|-----|----|---|------|------|-----------------------|------------------------|------|------|------|----------|----------|
| 403 | Cu | 2 | 0.73 | 1.75 | 76.4 <sup>j</sup> [5] | 31.82 <sup>j</sup> [5] | 2000 | 0.02 | 4.44 | 5.00E-05 | 7.62E-01 |
| 404 | Cu | 2 | 0.73 | 1.75 | 76.4 <sup>j</sup> [5] | 31.82 <sup>j</sup> [5] | 2000 | 0.02 | 4.72 | 5.00E-05 | 8.57E-01 |
| 405 | Cu | 2 | 0.73 | 1.75 | 76.4 <sup>j</sup> [5] | 31.82 <sup>j</sup> [5] | 2000 | 0.02 | 5.2  | 5.00E-05 | 1.03E+00 |
| 406 | Cu | 2 | 0.73 | 1.75 | 76.4 <sup>j</sup> [5] | 31.82 <sup>j</sup> [5] | 2000 | 0.02 | 5.75 | 5.00E-05 | 1.09E+00 |
| 407 | Cu | 2 | 0.73 | 1.75 | 76.4 <sup>j</sup> [5] | 31.82 <sup>j</sup> [5] | 2000 | 0.02 | 6.22 | 5.00E-05 | 1.87E+00 |
| 408 | Cu | 2 | 0.73 | 1.75 | 76.4 <sup>j</sup> [5] | 31.82 <sup>j</sup> [5] | 2000 | 0.02 | 6.74 | 5.00E-05 | 5.90E+00 |
| 409 | Cu | 2 | 0.73 | 1.75 | 76.4 <sup>j</sup> [5] | 31.82 <sup>j</sup> [5] | 2000 | 0.02 | 6.94 | 5.00E-05 | 1.55E+01 |
| 410 | Cu | 2 | 0.73 | 1.75 | 76.4 <sup>j</sup> [5] | 31.82 <sup>j</sup> [5] | 2000 | 0.02 | 7.52 | 5.00E-05 | 3.99E+01 |
| 411 | Cu | 2 | 0.73 | 1.75 | 76.4 <sup>j</sup> [5] | 31.82 <sup>j</sup> [5] | 2000 | 0.02 | 7.77 | 5.00E-05 | 8.27E+01 |
| 412 | Cu | 2 | 0.73 | 1.75 | 76.4 <sup>j</sup> [5] | 31.82 <sup>j</sup> [5] | 2000 | 0.02 | 8.45 | 5.00E-05 | 1.69E+02 |
| 413 | Cu | 2 | 0.73 | 1.75 | 76.4 <sup>j</sup> [5] | 31.82 <sup>j</sup> [5] | 2000 | 0.02 | 10   | 5.00E-05 | 2.45E+02 |
| 414 | Cu | 2 | 0.73 | 1.75 | 76.4 <sup>j</sup> [5] | 31.82 <sup>j</sup> [5] | 2000 | 0.1  | 3    | 5.00E-05 | 4.11E-02 |
| 415 | Cu | 2 | 0.73 | 1.75 | 76.4 <sup>j</sup> [5] | 31.82 <sup>j</sup> [5] | 2000 | 0.1  | 3.18 | 5.00E-05 | 4.95E-02 |
| 416 | Cu | 2 | 0.73 | 1.75 | 76.4 <sup>j</sup> [5] | 31.82 <sup>j</sup> [5] | 2000 | 0.1  | 3.73 | 5.00E-05 | 1.15E-01 |
| 417 | Cu | 2 | 0.73 | 1.75 | 76.4 <sup>j</sup> [5] | 31.82 <sup>j</sup> [5] | 2000 | 0.1  | 4.24 | 5.00E-05 | 7.89E-02 |
| 418 | Cu | 2 | 0.73 | 1.75 | 76.4 <sup>j</sup> [5] | 31.82 <sup>j</sup> [5] | 2000 | 0.1  | 4.66 | 5.00E-05 | 1.79E-01 |
| 419 | Cu | 2 | 0.73 | 1.75 | 76.4 <sup>j</sup> [5] | 31.82 <sup>j</sup> [5] | 2000 | 0.1  | 4.93 | 5.00E-05 | 2.84E-01 |
| 420 | Cu | 2 | 0.73 | 1.75 | 76.4 <sup>j</sup> [5] | 31.82 <sup>j</sup> [5] | 2000 | 0.1  | 5.31 | 5.00E-05 | 1.88E-01 |
| 421 | Cu | 2 | 0.73 | 1.75 | 76.4 <sup>j</sup> [5] | 31.82 <sup>j</sup> [5] | 2000 | 0.1  | 5.93 | 5.00E-05 | 4.29E-01 |
| 422 | Cu | 2 | 0.73 | 1.75 | 76.4 <sup>j</sup> [5] | 31.82 <sup>j</sup> [5] | 2000 | 0.1  | 6.47 | 5.00E-05 | 1.03E+00 |
| 423 | Cu | 2 | 0.73 | 1.75 | 76.4 <sup>j</sup> [5] | 31.82 <sup>j</sup> [5] | 2000 | 0.1  | 6.88 | 5.00E-05 | 3.78E+00 |
| 424 | Cu | 2 | 0.73 | 1.75 | 76.4 <sup>j</sup> [5] | 31.82 <sup>j</sup> [5] | 2000 | 0.1  | 7.1  | 5.00E-05 | 9.20E+00 |
| 425 | Cu | 2 | 0.73 | 1.75 | 76.4 <sup>j</sup> [5] | 31.82 <sup>j</sup> [5] | 2000 | 0.1  | 7.31 | 5.00E-05 | 3.39E+01 |
| 426 | Cu | 2 | 0.73 | 1.75 | 76.4 <sup>j</sup> [5] | 31.82 <sup>j</sup> [5] | 2000 | 0.1  | 7.77 | 5.00E-05 | 3.26E+01 |
| 427 | Cu | 2 | 0.73 | 1.75 | 76.4 <sup>j</sup> [5] | 31.82 <sup>j</sup> [5] | 2000 | 0.1  | 8.92 | 5.00E-05 | 2.02E+02 |
| 428 | Cu | 2 | 0.73 | 1.75 | 76.4 <sup>j</sup> [5] | 31.82 <sup>j</sup> [5] | 2000 | 0.1  | 9.49 | 5.00E-05 | 2.00E+02 |
| 429 | Cu | 2 | 0.73 | 1.75 | 76.4 <sup>j</sup> [5] | 31.82 <sup>j</sup> [5] | 2000 | 0.02 | 3.02 | 5.00E-06 | 6.74E-01 |
| 430 | Cu | 2 | 0.73 | 1.75 | 76.4 <sup>j</sup> [5] | 31.82 <sup>j</sup> [5] | 2000 | 0.02 | 3.34 | 5.00E-06 | 8.10E-01 |
| 431 | Cu | 2 | 0.73 | 1.75 | 76.4 <sup>j</sup> [5] | 31.82 <sup>j</sup> [5] | 2000 | 0.02 | 3.74 | 5.00E-06 | 9.96E-01 |
| 432 | Cu | 2 | 0.73 | 1.75 | 76.4 <sup>j</sup> [5] | 31.82 <sup>j</sup> [5] | 2000 | 0.02 | 4.25 | 5.00E-06 | 1.24E+00 |
| 433 | Cu | 2 | 0.73 | 1.75 | 76.4 <sup>j</sup> [5] | 31.82 <sup>j</sup> [5] | 2000 | 0.02 | 4.61 | 5.00E-06 | 1.64E+00 |
| 434 | Cu | 2 | 0.73 | 1.75 | 76.4 <sup>j</sup> [5] | 31.82 <sup>j</sup> [5] | 2000 | 0.02 | 5.13 | 5.00E-06 | 2.13E+00 |
| 435 | Cu | 2 | 0.73 | 1.75 | 76.4 <sup>j</sup> [5] | 31.82 <sup>j</sup> [5] | 2000 | 0.02 | 5.63 | 5.00E-06 | 3.56E+00 |
| 436 | Cu | 2 | 0.73 | 1.75 | 76.4 <sup>j</sup> [5] | 31.82 <sup>j</sup> [5] | 2000 | 0.02 | 5.86 | 5.00E-06 | 5.38E+00 |
| 437 | Cu | 2 | 0.73 | 1.75 | 76.4 <sup>j</sup> [5] | 31.82 <sup>j</sup> [5] | 2000 | 0.02 | 6.34 | 5.00E-06 | 1.15E+01 |
| 438 | Cu | 2 | 0.73 | 1.75 | 76.4 <sup>j</sup> [5] | 31.82 <sup>j</sup> [5] | 2000 | 0.02 | 6.42 | 5.00E-06 | 1.76E+01 |
| 439 | Cu | 2 | 0.73 | 1.75 | 76.4 <sup>j</sup> [5] | 31.82 <sup>j</sup> [5] | 2000 | 0.02 | 6.58 | 5.00E-06 | 1.84E+01 |
| 440 | Cu | 2 | 0.73 | 1.75 | 76.4 <sup>j</sup> [5] | 31.82 <sup>j</sup> [5] | 2000 | 0.02 | 6.73 | 5.00E-06 | 3.40E+01 |
| 441 | Cu | 2 | 0.73 | 1.75 | 76.4 <sup>j</sup> [5] | 31.82 <sup>j</sup> [5] | 2000 | 0.02 | 7.48 | 5.00E-06 | 2.11E+02 |
| 442 | Cu | 2 | 0.73 | 1.75 | 76.4 <sup>j</sup> [5] | 31.82 <sup>j</sup> [5] | 2000 | 0.02 | 9.2  | 5.00E-06 | 2.00E+02 |
| 443 | Cu | 2 | 0.73 | 1.75 | 76.4 <sup>j</sup> [5] | 31.82 <sup>j</sup> [5] | 2000 | 0.1  | 3.04 | 5.00E-06 | 2.34E-01 |
| 444 | Cu | 2 | 0.73 | 1.75 | 76.4 <sup>j</sup> [5] | 31.82 <sup>j</sup> [5] | 2000 | 0.1  | 3.59 | 5.00E-06 | 3.84E-01 |
| 445 | Cu | 2 | 0.73 | 1.75 | 76.4 <sup>j</sup> [5] | 31.82 <sup>j</sup> [5] | 2000 | 0.1  | 4.14 | 5.00E-06 | 5.23E-01 |
| 446 | Cu | 2 | 0.73 | 1.75 | 76.4 <sup>j</sup> [5] | 31.82 <sup>j</sup> [5] | 2000 | 0.1  | 4.6  | 5.00E-06 | 7.16E-01 |
| 447 | Cu | 2 | 0.73 | 1.75 | 76.4 <sup>j</sup> [5] | 31.82 <sup>j</sup> [5] | 2000 | 0.1  | 5.08 | 5.00E-06 | 1.12E+00 |

|     |    |   |      |      |                       |                        |      |      |      |          |          |
|-----|----|---|------|------|-----------------------|------------------------|------|------|------|----------|----------|
| 448 | Cu | 2 | 0.73 | 1.75 | 76.4 <sup>j</sup> [5] | 31.82 <sup>j</sup> [5] | 2000 | 0.1  | 5.16 | 5.00E-06 | 1.43E+00 |
| 449 | Cu | 2 | 0.73 | 1.75 | 76.4 <sup>j</sup> [5] | 31.82 <sup>j</sup> [5] | 2000 | 0.1  | 6.08 | 5.00E-06 | 3.72E+00 |
| 450 | Cu | 2 | 0.73 | 1.75 | 76.4 <sup>j</sup> [5] | 31.82 <sup>j</sup> [5] | 2000 | 0.1  | 6.35 | 5.00E-06 | 9.88E+00 |
| 451 | Cu | 2 | 0.73 | 1.75 | 76.4 <sup>j</sup> [5] | 31.82 <sup>j</sup> [5] | 2000 | 0.1  | 6.56 | 5.00E-06 | 1.36E+01 |
| 452 | Cu | 2 | 0.73 | 1.75 | 76.4 <sup>j</sup> [5] | 31.82 <sup>j</sup> [5] | 2000 | 0.1  | 6.73 | 5.00E-06 | 1.98E+01 |
| 453 | Cu | 2 | 0.73 | 1.75 | 76.4 <sup>j</sup> [5] | 31.82 <sup>j</sup> [5] | 2000 | 0.1  | 6.76 | 5.00E-06 | 2.37E+01 |
| 454 | Cu | 2 | 0.73 | 1.75 | 76.4 <sup>j</sup> [5] | 31.82 <sup>j</sup> [5] | 2000 | 0.1  | 7.15 | 5.00E-06 | 6.17E+01 |
| 455 | Cu | 2 | 0.73 | 1.75 | 76.4 <sup>j</sup> [5] | 31.82 <sup>j</sup> [5] | 2000 | 0.1  | 7.28 | 5.00E-06 | 5.13E+01 |
| 456 | Cu | 2 | 0.73 | 1.75 | 76.4 <sup>j</sup> [5] | 31.82 <sup>j</sup> [5] | 2000 | 0.1  | 8.56 | 5.00E-06 | 3.80E+01 |
| 457 | Cu | 2 | 0.73 | 1.75 | 76.4 <sup>j</sup> [5] | 31.82 <sup>j</sup> [5] | 2000 | 0.1  | 9.75 | 5.00E-06 | 3.48E+01 |
| 458 | Cu | 2 | 0.73 | 1.75 | 76.4 <sup>j</sup> [5] | 31.82 <sup>j</sup> [5] | 2000 | 0.1  | 3.05 | 5.00E-07 | 4.37E-01 |
| 459 | Cu | 2 | 0.73 | 1.75 | 76.4 <sup>j</sup> [5] | 31.82 <sup>j</sup> [5] | 2000 | 0.1  | 3.57 | 5.00E-07 | 1.66E+00 |
| 460 | Cu | 2 | 0.73 | 1.75 | 76.4 <sup>j</sup> [5] | 31.82 <sup>j</sup> [5] | 2000 | 0.1  | 4.12 | 5.00E-07 | 3.76E+00 |
| 461 | Cu | 2 | 0.73 | 1.75 | 76.4 <sup>j</sup> [5] | 31.82 <sup>j</sup> [5] | 2000 | 0.1  | 4.57 | 5.00E-07 | 6.68E+00 |
| 462 | Cu | 2 | 0.73 | 1.75 | 76.4 <sup>j</sup> [5] | 31.82 <sup>j</sup> [5] | 2000 | 0.1  | 5.08 | 5.00E-07 | 1.47E+01 |
| 463 | Cu | 2 | 0.73 | 1.75 | 76.4 <sup>j</sup> [5] | 31.82 <sup>j</sup> [5] | 2000 | 0.1  | 5.86 | 5.00E-07 | 4.92E+01 |
| 464 | Cu | 2 | 0.73 | 1.75 | 76.4 <sup>j</sup> [5] | 31.82 <sup>j</sup> [5] | 2000 | 0.1  | 5.94 | 5.00E-07 | 2.23E+02 |
| 465 | Cu | 2 | 0.73 | 1.75 | 76.4 <sup>j</sup> [5] | 31.82 <sup>j</sup> [5] | 2000 | 0.1  | 6.37 | 5.00E-07 | 2.20E+02 |
| 466 | Cu | 2 | 0.73 | 1.75 | 76.4 <sup>j</sup> [5] | 31.82 <sup>j</sup> [5] | 2000 | 0.1  | 6.59 | 5.00E-07 | 1.19E+01 |
| 467 | Cu | 2 | 0.73 | 1.75 | 76.4 <sup>j</sup> [5] | 31.82 <sup>j</sup> [5] | 2000 | 0.1  | 6.73 | 5.00E-07 | 1.76E+01 |
| 468 | Cu | 2 | 0.73 | 1.75 | 76.4 <sup>j</sup> [5] | 31.82 <sup>j</sup> [5] | 2000 | 0.1  | 7.14 | 5.00E-07 | 1.75E+02 |
| 469 | Cu | 2 | 0.73 | 1.75 | 76.4 <sup>j</sup> [5] | 31.82 <sup>j</sup> [5] | 2000 | 0.1  | 8.31 | 5.00E-07 | 8.24E+01 |
| 470 | Cu | 2 | 0.73 | 1.75 | 76.4 <sup>j</sup> [5] | 31.82 <sup>j</sup> [5] | 2000 | 0.1  | 8.51 | 5.00E-07 | 1.28E+01 |
| 471 | Cu | 2 | 0.73 | 1.75 | 76.4 <sup>j</sup> [5] | 31.82 <sup>j</sup> [5] | 2000 | 0.1  | 9.76 | 5.00E-07 | 7.54E+00 |
| 472 | Ni | 2 | 0.69 | 1.75 | 76.4 <sup>j</sup> [5] | 31.82 <sup>j</sup> [5] | 500  | 0.01 | 4.1  | 8.52E-06 | 2.13E+00 |
| 473 | Ni | 2 | 0.69 | 1.75 | 76.4 <sup>j</sup> [5] | 31.82 <sup>j</sup> [5] | 500  | 0.01 | 4.6  | 8.52E-06 | 2.33E+00 |
| 474 | Ni | 2 | 0.69 | 1.75 | 76.4 <sup>j</sup> [5] | 31.82 <sup>j</sup> [5] | 500  | 0.01 | 4.8  | 8.52E-06 | 2.56E+00 |
| 475 | Ni | 2 | 0.69 | 1.75 | 76.4 <sup>j</sup> [5] | 31.82 <sup>j</sup> [5] | 500  | 0.01 | 5.1  | 8.52E-06 | 2.44E+00 |
| 476 | Ni | 2 | 0.69 | 1.75 | 76.4 <sup>j</sup> [5] | 31.82 <sup>j</sup> [5] | 500  | 0.01 | 5.3  | 8.52E-06 | 2.56E+00 |
| 477 | Ni | 2 | 0.69 | 1.75 | 76.4 <sup>j</sup> [5] | 31.82 <sup>j</sup> [5] | 500  | 0.01 | 5.7  | 8.52E-06 | 2.57E+00 |
| 478 | Ni | 2 | 0.69 | 1.75 | 76.4 <sup>j</sup> [5] | 31.82 <sup>j</sup> [5] | 500  | 0.01 | 6.1  | 8.52E-06 | 2.70E+00 |
| 479 | Ni | 2 | 0.69 | 1.75 | 76.4 <sup>j</sup> [5] | 31.82 <sup>j</sup> [5] | 500  | 0.01 | 6.6  | 8.52E-06 | 2.71E+00 |
| 480 | Ni | 2 | 0.69 | 1.75 | 76.4 <sup>j</sup> [5] | 31.82 <sup>j</sup> [5] | 500  | 0.01 | 6.9  | 8.52E-06 | 4.14E+00 |
| 481 | Ni | 2 | 0.69 | 1.75 | 76.4 <sup>j</sup> [5] | 31.82 <sup>j</sup> [5] | 500  | 0.01 | 6.9  | 8.52E-06 | 3.76E+00 |
| 482 | Ni | 2 | 0.69 | 1.75 | 76.4 <sup>j</sup> [5] | 31.82 <sup>j</sup> [5] | 500  | 0.01 | 7.1  | 8.52E-06 | 1.98E+01 |
| 483 | Ni | 2 | 0.69 | 1.75 | 76.4 <sup>j</sup> [5] | 31.82 <sup>j</sup> [5] | 500  | 0.01 | 7.3  | 8.52E-06 | 1.06E+02 |
| 484 | Ni | 2 | 0.69 | 1.75 | 76.4 <sup>j</sup> [5] | 31.82 <sup>j</sup> [5] | 500  | 0.01 | 7.5  | 8.52E-06 | 2.13E+03 |
| 485 | Ni | 2 | 0.69 | 1.75 | 76.4 <sup>j</sup> [5] | 31.82 <sup>j</sup> [5] | 500  | 0.01 | 7.6  | 8.52E-06 | 2.13E+03 |
| 486 | Ni | 2 | 0.69 | 1.75 | 76.4 <sup>j</sup> [5] | 31.82 <sup>j</sup> [5] | 500  | 0.01 | 4.2  | 2.03E-06 | 1.02E+00 |
| 487 | Ni | 2 | 0.69 | 1.75 | 76.4 <sup>j</sup> [5] | 31.82 <sup>j</sup> [5] | 500  | 0.01 | 4.6  | 2.03E-06 | 7.63E-01 |
| 488 | Ni | 2 | 0.69 | 1.75 | 76.4 <sup>j</sup> [5] | 31.82 <sup>j</sup> [5] | 500  | 0.01 | 4.9  | 2.03E-06 | 6.87E-01 |
| 489 | Ni | 2 | 0.69 | 1.75 | 76.4 <sup>j</sup> [5] | 31.82 <sup>j</sup> [5] | 500  | 0.01 | 5.2  | 2.03E-06 | 4.98E-01 |
| 490 | Ni | 2 | 0.69 | 1.75 | 76.4 <sup>j</sup> [5] | 31.82 <sup>j</sup> [5] | 500  | 0.01 | 5.6  | 2.03E-06 | 1.88E-01 |
| 491 | Ni | 2 | 0.69 | 1.75 | 76.4 <sup>j</sup> [5] | 31.82 <sup>j</sup> [5] | 500  | 0.01 | 5.9  | 2.03E-06 | 2.02E-01 |
| 492 | Ni | 2 | 0.69 | 1.75 | 76.4 <sup>j</sup> [5] | 31.82 <sup>j</sup> [5] | 500  | 0.01 | 6.6  | 2.03E-06 | 7.42E-02 |

|     |    |   |      |      |                       |                        |     |                      |     |          |          |
|-----|----|---|------|------|-----------------------|------------------------|-----|----------------------|-----|----------|----------|
| 493 | Ni | 2 | 0.69 | 1.75 | 76.4 <sup>j</sup> [5] | 31.82 <sup>j</sup> [5] | 500 | 0.01                 | 6.8 | 2.03E-06 | 1.12E-01 |
| 494 | Ni | 2 | 0.69 | 1.75 | 76.4 <sup>j</sup> [5] | 31.82 <sup>j</sup> [5] | 500 | 0.01                 | 7   | 2.03E-06 | 4.17E-02 |
| 495 | Ni | 2 | 0.69 | 1.75 | 76.4 <sup>j</sup> [5] | 31.82 <sup>j</sup> [5] | 500 | 0.01                 | 7.3 | 2.03E-06 | 1.93E-01 |
| 496 | Ni | 2 | 0.69 | 1.75 | 76.4 <sup>j</sup> [5] | 31.82 <sup>j</sup> [5] | 500 | 0.01                 | 6   | 3.64E-07 | 1.51E+00 |
| 497 | Ni | 2 | 0.69 | 1.75 | 76.4 <sup>j</sup> [5] | 31.82 <sup>j</sup> [5] | 500 | 0.01                 | 6   | 7.85E-07 | 2.17E+00 |
| 498 | Ni | 2 | 0.69 | 1.75 | 76.4 <sup>j</sup> [5] | 31.82 <sup>j</sup> [5] | 500 | 0.01                 | 6   | 1.38E-06 | 2.40E+00 |
| 499 | Ni | 2 | 0.69 | 1.75 | 76.4 <sup>j</sup> [5] | 31.82 <sup>j</sup> [5] | 500 | 0.01                 | 6   | 3.48E-06 | 2.35E+00 |
| 500 | Ni | 2 | 0.69 | 1.75 | 76.4 <sup>j</sup> [5] | 31.82 <sup>j</sup> [5] | 500 | 0.01                 | 6   | 5.36E-06 | 2.23E+00 |
| 501 | Ni | 2 | 0.69 | 1.75 | 76.4 <sup>j</sup> [5] | 31.82 <sup>j</sup> [5] | 500 | 0.01                 | 6   | 7.15E-06 | 2.30E+00 |
| 502 | Ni | 2 | 0.69 | 1.75 | 76.4 <sup>j</sup> [5] | 31.82 <sup>j</sup> [5] | 500 | 0.01                 | 6   | 1.03E-05 | 2.17E+00 |
| 503 | Ni | 2 | 0.69 | 1.75 | 76.4 <sup>j</sup> [5] | 31.82 <sup>j</sup> [5] | 500 | 0.01                 | 6   | 1.35E-05 | 2.03E+00 |
| 504 | Ni | 2 | 0.69 | 1.75 | 76.4 <sup>j</sup> [5] | 31.82 <sup>j</sup> [5] | 500 | 0.01                 | 6   | 1.69E-05 | 1.94E+00 |
| 505 | Ni | 2 | 0.69 | 1.75 | 76.4 <sup>j</sup> [5] | 31.82 <sup>j</sup> [5] | 500 | 0.01                 | 6   | 4.91E-07 | 2.00E-01 |
| 506 | Ni | 2 | 0.69 | 1.75 | 76.4 <sup>j</sup> [5] | 31.82 <sup>j</sup> [5] | 500 | 0.01                 | 6   | 1.04E-06 | 3.34E-01 |
| 507 | Ni | 2 | 0.69 | 1.75 | 76.4 <sup>j</sup> [5] | 31.82 <sup>j</sup> [5] | 500 | 0.01                 | 6   | 1.61E-06 | 4.23E-01 |
| 508 | Ni | 2 | 0.69 | 1.75 | 76.4 <sup>j</sup> [5] | 31.82 <sup>j</sup> [5] | 500 | 0.01                 | 6   | 2.56E-06 | 5.45E-01 |
| 509 | Ni | 2 | 0.69 | 1.75 | 76.4 <sup>j</sup> [5] | 31.82 <sup>j</sup> [5] | 500 | 0.01                 | 6   | 3.40E-06 | 4.27E-01 |
| 510 | Ni | 2 | 0.69 | 1.75 | 76.4 <sup>j</sup> [5] | 31.82 <sup>j</sup> [5] | 500 | 0.01                 | 6   | 5.10E-06 | 5.28E-01 |
| 511 | Ni | 2 | 0.69 | 1.75 | 76.4 <sup>j</sup> [5] | 31.82 <sup>j</sup> [5] | 500 | 0.01                 | 6   | 6.90E-06 | 5.40E-01 |
| 512 | Ni | 2 | 0.69 | 1.75 | 76.4 <sup>j</sup> [5] | 31.82 <sup>j</sup> [5] | 500 | 0.01                 | 6   | 8.62E-06 | 6.46E-01 |
| 513 | Ni | 2 | 0.69 | 1.75 | 76.4 <sup>j</sup> [5] | 31.82 <sup>j</sup> [5] | 500 | 0.01                 | 6   | 3.66E-07 | 7.73E-02 |
| 514 | Ni | 2 | 0.69 | 1.75 | 76.4 <sup>j</sup> [5] | 31.82 <sup>j</sup> [5] | 500 | 0.01                 | 6   | 6.07E-07 | 9.48E-02 |
| 515 | Ni | 2 | 0.69 | 1.75 | 76.4 <sup>j</sup> [5] | 31.82 <sup>j</sup> [5] | 500 | 0.01                 | 6   | 8.82E-07 | 3.32E-02 |
| 516 | Ni | 2 | 0.69 | 1.75 | 76.4 <sup>j</sup> [5] | 31.82 <sup>j</sup> [5] | 500 | 0.01                 | 6   | 1.35E-06 | 4.22E-02 |
| 517 | Ni | 2 | 0.69 | 1.75 | 76.4 <sup>j</sup> [5] | 31.82 <sup>j</sup> [5] | 500 | 0.01                 | 6   | 1.85E-06 | 6.06E-02 |
| 518 | Ni | 2 | 0.69 | 1.75 | 76.4 <sup>j</sup> [5] | 31.82 <sup>j</sup> [5] | 500 | 0.01                 | 6   | 2.26E-06 | 3.82E-02 |
| 519 | Ni | 2 | 0.69 | 1.75 | 76.4 <sup>j</sup> [5] | 31.82 <sup>j</sup> [5] | 500 | 0.01                 | 6   | 3.06E-06 | 1.05E-01 |
| 520 | Ni | 2 | 0.69 | 1.75 | 76.4 <sup>j</sup> [5] | 31.82 <sup>j</sup> [5] | 500 | 0.01                 | 6   | 3.70E-06 | 1.02E-01 |
| 521 | Ni | 2 | 0.69 | 1.75 | 76.4 <sup>j</sup> [5] | 31.82 <sup>j</sup> [5] | 500 | 0.01                 | 6   | 4.38E-06 | 1.30E-01 |
| 522 | Cs | 1 | 1.67 | 0.86 | 73.2 <sup>k</sup> [4] | 687 <sup>k</sup> [4]   | 20  | 0.6 <sup>m</sup> [8] | 7.8 | 1.50E-07 | 5.10E-02 |
| 523 | Cs | 1 | 1.67 | 0.86 | 73.2 <sup>k</sup> [4] | 687 <sup>k</sup> [4]   | 20  | 0.6 <sup>m</sup> [8] | 7.7 | 1.50E-07 | 7.70E-02 |
| 524 | Cs | 1 | 1.67 | 0.86 | 73.2 <sup>k</sup> [4] | 687 <sup>k</sup> [4]   | 20  | 0.6 <sup>m</sup> [8] | 7.7 | 1.50E-07 | 9.30E-02 |
| 525 | Cs | 1 | 1.67 | 0.86 | 73.2 <sup>k</sup> [4] | 687 <sup>k</sup> [4]   | 20  | 0.6 <sup>m</sup> [8] | 8.5 | 1.50E-07 | 6.60E-02 |
| 526 | Cs | 1 | 1.67 | 0.86 | 73.2 <sup>k</sup> [4] | 687 <sup>k</sup> [4]   | 20  | 0.6 <sup>m</sup> [8] | 8.4 | 1.50E-07 | 9.20E-02 |
| 527 | Cs | 1 | 1.67 | 0.86 | 73.2 <sup>k</sup> [4] | 687 <sup>k</sup> [4]   | 20  | 0.6 <sup>m</sup> [8] | 8.4 | 1.50E-07 | 6.60E-02 |
| 528 | Cs | 1 | 1.67 | 0.86 | 73.2 <sup>k</sup> [4] | 687 <sup>k</sup> [4]   | 20  | 0.6 <sup>m</sup> [8] | 8.6 | 1.50E-07 | 6.50E-02 |
| 529 | Cs | 1 | 1.67 | 0.86 | 73.2 <sup>k</sup> [4] | 687 <sup>k</sup> [4]   | 20  | 0.6 <sup>m</sup> [8] | 8.6 | 1.50E-07 | 6.10E-02 |
| 530 | Cs | 1 | 1.67 | 0.86 | 73.2 <sup>k</sup> [4] | 687 <sup>k</sup> [4]   | 20  | 0.6 <sup>m</sup> [8] | 8.5 | 1.50E-07 | 7.40E-02 |
| 531 | Cs | 1 | 1.67 | 0.86 | 73.2 <sup>k</sup> [4] | 687 <sup>k</sup> [4]   | 20  | 0.7                  | 8.6 | 1.50E-07 | 5.50E-02 |
| 532 | Cs | 1 | 1.67 | 0.86 | 73.2 <sup>k</sup> [4] | 687 <sup>k</sup> [4]   | 20  | 0.7                  | 8.1 | 1.50E-07 | 6.40E-02 |
| 533 | Cs | 1 | 1.67 | 0.86 | 73.2 <sup>k</sup> [4] | 687 <sup>k</sup> [4]   | 20  | 0.7                  | 8.4 | 1.50E-07 | 5.80E-02 |
| 534 | Cs | 1 | 1.67 | 0.86 | 73.2 <sup>k</sup> [4] | 687 <sup>k</sup> [4]   | 20  | 0.7                  | 8.2 | 1.50E-07 | 6.50E-02 |
| 535 | Cs | 1 | 1.67 | 0.86 | 73.2 <sup>k</sup> [4] | 687 <sup>k</sup> [4]   | 20  | 0.7                  | 8.7 | 1.50E-07 | 5.80E-02 |
| 536 | Cs | 1 | 1.67 | 0.86 | 73.2 <sup>k</sup> [4] | 687 <sup>k</sup> [4]   | 20  | 0.7                  | 8.6 | 1.50E-07 | 5.30E-02 |
| 537 | Cs | 1 | 1.67 | 0.86 | 73.2 <sup>k</sup> [4] | 687 <sup>k</sup> [4]   | 20  | 0.7                  | 8.2 | 1.50E-07 | 6.40E-02 |

|     |    |   |       |      |                       |                      |     |                        |      |          |          |
|-----|----|---|-------|------|-----------------------|----------------------|-----|------------------------|------|----------|----------|
| 538 | Cs | 1 | 1.67  | 0.86 | 73.2 <sup>k</sup> [4] | 687 <sup>k</sup> [4] | 20  | 0.7                    | 8.5  | 1.50E-07 | 5.70E-02 |
| 539 | Cs | 1 | 1.67  | 0.86 | 73.2 <sup>k</sup> [4] | 687 <sup>k</sup> [4] | 20  | 0.02                   | 8.5  | 1.50E-07 | 8.80E-01 |
| 540 | Cs | 1 | 1.67  | 0.86 | 73.2 <sup>k</sup> [4] | 687 <sup>k</sup> [4] | 20  | 0.02                   | 8.7  | 1.50E-07 | 1.20E+00 |
| 541 | Cs | 1 | 1.67  | 0.86 | 73.2 <sup>k</sup> [4] | 687 <sup>k</sup> [4] | 20  | 0.02                   | 9    | 1.50E-07 | 1.00E+00 |
| 542 | Cs | 1 | 1.67  | 0.86 | 73.2 <sup>k</sup> [4] | 687 <sup>k</sup> [4] | 20  | 0.1                    | 8.4  | 1.50E-07 | 2.40E-01 |
| 543 | Cs | 1 | 1.67  | 0.86 | 73.2 <sup>k</sup> [4] | 687 <sup>k</sup> [4] | 20  | 0.1                    | 8.4  | 1.50E-07 | 3.50E-01 |
| 544 | Cs | 1 | 1.67  | 0.86 | 73.2 <sup>k</sup> [4] | 687 <sup>k</sup> [4] | 20  | 0.1                    | 8.4  | 1.50E-07 | 3.80E-01 |
| 545 | Cs | 1 | 1.67  | 0.86 | 73.2 <sup>k</sup> [4] | 687 <sup>k</sup> [4] | 20  | 0.02                   | 9.4  | 1.50E-07 | 1.00E-01 |
| 546 | Cs | 1 | 1.67  | 0.86 | 73.2 <sup>k</sup> [4] | 687 <sup>k</sup> [4] | 20  | 0.02                   | 9.5  | 1.50E-07 | 1.00E-01 |
| 547 | Cs | 1 | 1.67  | 0.86 | 73.2 <sup>k</sup> [4] | 687 <sup>k</sup> [4] | 20  | 0.1                    | 8.9  | 1.50E-07 | 7.60E-01 |
| 548 | Cs | 1 | 1.67  | 0.86 | 73.2 <sup>k</sup> [4] | 687 <sup>k</sup> [4] | 20  | 0.1                    | 9    | 1.50E-07 | 1.10E+00 |
| 549 | Cs | 1 | 1.67  | 0.86 | 73.2 <sup>k</sup> [4] | 687 <sup>k</sup> [4] | 20  | 0.7                    | 8.8  | 1.50E-07 | 4.60E-02 |
| 550 | Cs | 1 | 1.67  | 0.86 | 73.2 <sup>k</sup> [4] | 687 <sup>k</sup> [4] | 20  | 0.7                    | 8.7  | 1.50E-07 | 3.60E-02 |
| 551 | Tc | 4 | 0.645 | 1.36 | 73.2 <sup>k</sup> [4] | 687 <sup>k</sup> [4] | 100 | 0.715 <sup>n</sup> [9] | 8.2  | 5.00E-11 | 1.00E+01 |
| 552 | Tc | 4 | 0.645 | 1.36 | 73.2 <sup>k</sup> [4] | 687 <sup>k</sup> [4] | 100 | 0.715 <sup>n</sup> [9] | 8.2  | 5.00E-11 | 1.00E+01 |
| 553 | Tc | 7 | 0.56  | 1.36 | 73.2 <sup>k</sup> [4] | 687 <sup>k</sup> [4] | 100 | 0.715 <sup>n</sup> [9] | 8    | 5.00E-11 | 2.10E-01 |
| 554 | Tc | 7 | 0.56  | 1.36 | 73.2 <sup>k</sup> [4] | 687 <sup>k</sup> [4] | 100 | 0.715 <sup>n</sup> [9] | 8.1  | 5.00E-11 | 2.20E-01 |
| 555 | Tc | 7 | 0.56  | 1.36 | 73.2 <sup>k</sup> [4] | 687 <sup>k</sup> [4] | 100 | 0.715 <sup>n</sup> [9] | 8    | 5.00E-11 | 2.30E-01 |
| 556 | Tc | 7 | 0.56  | 1.36 | 73.2 <sup>k</sup> [4] | 687 <sup>k</sup> [4] | 100 | 0.715 <sup>n</sup> [9] | 8.1  | 5.00E-11 | 2.40E-01 |
| 557 | Tc | 7 | 0.56  | 1.36 | 73.2 <sup>k</sup> [4] | 687 <sup>k</sup> [4] | 100 | 0                      | 10.1 | 5.00E-11 | 4.80E-02 |
| 558 | Tc | 7 | 0.56  | 1.36 | 73.2 <sup>k</sup> [4] | 687 <sup>k</sup> [4] | 100 | 0                      | 10.1 | 5.00E-11 | 5.10E-02 |
| 559 | Tc | 7 | 0.56  | 1.36 | 73.2 <sup>k</sup> [4] | 687 <sup>k</sup> [4] | 100 | 0                      | 10.2 | 5.00E-11 | 5.50E-02 |
| 560 | Tc | 4 | 0.645 | 1.36 | 73.2 <sup>k</sup> [4] | 687 <sup>k</sup> [4] | 100 | 0                      | 10.1 | 5.00E-11 | 5.90E-01 |
| 561 | Tc | 7 | 0.56  | 1.36 | 73.2 <sup>k</sup> [4] | 687 <sup>k</sup> [4] | 100 | 0                      | 10.2 | 5.00E-11 | 5.90E-02 |
| 562 | Tc | 4 | 0.645 | 1.36 | 73.2 <sup>k</sup> [4] | 687 <sup>k</sup> [4] | 100 | 0                      | 10.2 | 5.00E-11 | 6.20E-01 |
| 563 | Tc | 4 | 0.645 | 1.36 | 73.2 <sup>k</sup> [4] | 687 <sup>k</sup> [4] | 100 | 0                      | 10.1 | 5.00E-11 | 6.40E-01 |
| 564 | Tc | 4 | 0.645 | 1.36 | 73.2 <sup>k</sup> [4] | 687 <sup>k</sup> [4] | 100 | 0                      | 10.2 | 5.00E-11 | 6.40E-01 |
| 565 | Tc | 4 | 0.645 | 1.36 | 73.2 <sup>k</sup> [4] | 687 <sup>k</sup> [4] | 100 | 0.715 <sup>n</sup> [9] | 8.2  | 5.00E-11 | 9.10E+00 |
| 566 | Tc | 4 | 0.645 | 1.36 | 73.2 <sup>k</sup> [4] | 687 <sup>k</sup> [4] | 100 | 0.715 <sup>n</sup> [9] | 8.2  | 5.00E-11 | 9.80E+00 |
| 567 | U  | 4 | 0.89  | 1.22 | 73.2 <sup>k</sup> [4] | 687 <sup>k</sup> [4] | 100 | 0                      | 10.2 | 1.50E-07 | 1.50E+02 |
| 568 | U  | 4 | 0.89  | 1.22 | 73.2 <sup>k</sup> [4] | 687 <sup>k</sup> [4] | 100 | 0.715 <sup>n</sup> [9] | 8    | 1.50E-07 | 1.50E+02 |
| 569 | U  | 6 | 0.73  | 1.22 | 73.2 <sup>k</sup> [4] | 687 <sup>k</sup> [4] | 100 | 0.715 <sup>n</sup> [9] | 8.2  | 1.50E-07 | 1.50E-01 |
| 570 | U  | 4 | 0.89  | 1.22 | 73.2 <sup>k</sup> [4] | 687 <sup>k</sup> [4] | 100 | 0.715 <sup>n</sup> [9] | 8.1  | 1.50E-07 | 1.60E+02 |
| 571 | U  | 6 | 0.73  | 1.22 | 73.2 <sup>k</sup> [4] | 687 <sup>k</sup> [4] | 100 | 0.715 <sup>n</sup> [9] | 8.2  | 1.50E-07 | 1.60E-01 |
| 572 | U  | 6 | 0.73  | 1.22 | 73.2 <sup>k</sup> [4] | 687 <sup>k</sup> [4] | 100 | 0.715 <sup>n</sup> [9] | 8.1  | 1.50E-07 | 1.70E+02 |
| 573 | U  | 4 | 0.89  | 1.22 | 73.2 <sup>k</sup> [4] | 687 <sup>k</sup> [4] | 100 | 0.715 <sup>n</sup> [9] | 8    | 1.50E-07 | 1.80E+02 |
| 574 | U  | 6 | 0.73  | 1.22 | 73.2 <sup>k</sup> [4] | 687 <sup>k</sup> [4] | 100 | 0                      | 10.2 | 1.50E-07 | 1.80E-01 |
| 575 | U  | 6 | 0.73  | 1.22 | 73.2 <sup>k</sup> [4] | 687 <sup>k</sup> [4] | 100 | 0                      | 10.2 | 1.50E-07 | 1.90E-01 |
| 576 | U  | 6 | 0.73  | 1.22 | 73.2 <sup>k</sup> [4] | 687 <sup>k</sup> [4] | 100 | 0.715 <sup>n</sup> [9] | 8.2  | 1.50E-07 | 1.90E-01 |
| 577 | U  | 6 | 0.73  | 1.22 | 73.2 <sup>k</sup> [4] | 687 <sup>k</sup> [4] | 100 | 0.715 <sup>n</sup> [9] | 8.2  | 1.50E-07 | 2.00E-01 |
| 578 | U  | 6 | 0.73  | 1.22 | 73.2 <sup>k</sup> [4] | 687 <sup>k</sup> [4] | 100 | 0                      | 10.2 | 1.50E-07 | 2.30E-01 |
| 579 | U  | 6 | 0.73  | 1.22 | 73.2 <sup>k</sup> [4] | 687 <sup>k</sup> [4] | 100 | 0                      | 10.2 | 1.50E-07 | 2.40E-01 |
| 580 | U  | 4 | 0.89  | 1.22 | 73.2 <sup>k</sup> [4] | 687 <sup>k</sup> [4] | 100 | 0                      | 10.2 | 1.50E-07 | 5.20E+02 |
| 581 | U  | 4 | 0.89  | 1.22 | 73.2 <sup>k</sup> [4] | 687 <sup>k</sup> [4] | 100 | 0                      | 10.2 | 1.50E-07 | 5.90E+02 |
| 582 | U  | 4 | 0.89  | 1.22 | 73.2 <sup>k</sup> [4] | 687 <sup>k</sup> [4] | 100 | 0                      | 10.2 | 1.50E-07 | 6.70E+02 |

|     |    |   |       |      |                       |                      |    |   |      |          |          |
|-----|----|---|-------|------|-----------------------|----------------------|----|---|------|----------|----------|
| 583 | Cm | 3 | 0.97  | 1.2  | 73.2 <sup>k</sup> [4] | 687 <sup>k</sup> [4] | 20 | 0 | 10.1 | 1.00E-10 | 2.10E+02 |
| 584 | Cm | 3 | 0.97  | 1.2  | 73.2 <sup>k</sup> [4] | 687 <sup>k</sup> [4] | 20 | 0 | 9.4  | 1.00E-10 | 2.10E+02 |
| 585 | Cm | 3 | 0.97  | 1.2  | 73.2 <sup>k</sup> [4] | 687 <sup>k</sup> [4] | 20 | 0 | 9.4  | 1.00E-10 | 2.30E+01 |
| 586 | Cm | 3 | 0.97  | 1.2  | 73.2 <sup>k</sup> [4] | 687 <sup>k</sup> [4] | 20 | 0 | 10.1 | 1.00E-10 | 3.50E+01 |
| 587 | Cm | 3 | 0.97  | 1.2  | 73.2 <sup>k</sup> [4] | 687 <sup>k</sup> [4] | 20 | 0 | 9.4  | 1.00E-10 | 5.10E+02 |
| 588 | Cm | 3 | 0.97  | 1.2  | 73.2 <sup>k</sup> [4] | 687 <sup>k</sup> [4] | 20 | 0 | 10.1 | 1.00E-10 | 5.20E+01 |
| 589 | Cm | 3 | 0.97  | 1.2  | 73.2 <sup>k</sup> [4] | 687 <sup>k</sup> [4] | 20 | 0 | 10.1 | 1.00E-10 | 6.50E+01 |
| 590 | Cm | 3 | 0.97  | 1.2  | 73.2 <sup>k</sup> [4] | 687 <sup>k</sup> [4] | 20 | 0 | 9.4  | 1.00E-10 | 6.90E+01 |
| 591 | Tc | 4 | 0.645 | 1.36 | 73.2 <sup>k</sup> [4] | 687 <sup>k</sup> [4] | 20 | 0 | 9.4  | 8.00E-11 | 1.30E+01 |
| 592 | Tc | 4 | 0.645 | 1.36 | 73.2 <sup>k</sup> [4] | 687 <sup>k</sup> [4] | 20 | 0 | 10   | 8.00E-11 | 1.40E+00 |
| 593 | Tc | 4 | 0.645 | 1.36 | 73.2 <sup>k</sup> [4] | 687 <sup>k</sup> [4] | 20 | 0 | 10   | 8.00E-11 | 1.50E+00 |
| 594 | Tc | 4 | 0.645 | 1.36 | 73.2 <sup>k</sup> [4] | 687 <sup>k</sup> [4] | 20 | 0 | 9.4  | 8.00E-11 | 1.50E+01 |
| 595 | Tc | 4 | 0.645 | 1.36 | 73.2 <sup>k</sup> [4] | 687 <sup>k</sup> [4] | 20 | 0 | 10.1 | 8.00E-11 | 1.60E+00 |
| 596 | Tc | 4 | 0.645 | 1.36 | 73.2 <sup>k</sup> [4] | 687 <sup>k</sup> [4] | 20 | 0 | 10.1 | 8.00E-11 | 1.70E+00 |
| 597 | Tc | 4 | 0.645 | 1.36 | 73.2 <sup>k</sup> [4] | 687 <sup>k</sup> [4] | 20 | 0 | 9.4  | 8.00E-11 | 2.10E+01 |
| 598 | Tc | 4 | 0.645 | 1.36 | 73.2 <sup>k</sup> [4] | 687 <sup>k</sup> [4] | 20 | 0 | 9.4  | 8.00E-11 | 8.00E+00 |
| 599 | U  | 4 | 0.89  | 1.22 | 73.2 <sup>k</sup> [4] | 687 <sup>k</sup> [4] | 20 | 0 | 10.1 | 1.00E-07 | 1.70E+01 |
| 600 | U  | 4 | 0.89  | 1.22 | 73.2 <sup>k</sup> [4] | 687 <sup>k</sup> [4] | 20 | 0 | 10.1 | 1.00E-07 | 1.80E+01 |
| 601 | U  | 4 | 0.89  | 1.22 | 73.2 <sup>k</sup> [4] | 687 <sup>k</sup> [4] | 20 | 0 | 9.4  | 1.00E-07 | 2.70E+01 |
| 602 | U  | 4 | 0.89  | 1.22 | 73.2 <sup>k</sup> [4] | 687 <sup>k</sup> [4] | 20 | 0 | 10.1 | 1.00E-07 | 2.80E+01 |
| 603 | U  | 4 | 0.89  | 1.22 | 73.2 <sup>k</sup> [4] | 687 <sup>k</sup> [4] | 20 | 0 | 9.4  | 1.00E-07 | 3.30E+01 |
| 604 | U  | 4 | 0.89  | 1.22 | 73.2 <sup>k</sup> [4] | 687 <sup>k</sup> [4] | 20 | 0 | 9.4  | 1.00E-07 | 3.80E+01 |
| 605 | U  | 4 | 0.89  | 1.22 | 73.2 <sup>k</sup> [4] | 687 <sup>k</sup> [4] | 20 | 0 | 10.1 | 1.00E-07 | 3.90E+01 |
| 606 | U  | 4 | 0.89  | 1.22 | 73.2 <sup>k</sup> [4] | 687 <sup>k</sup> [4] | 20 | 0 | 9.4  | 1.00E-07 | 5.20E+01 |
| 607 | Ac | 3 | 1.12  | 1    | 73.2 <sup>k</sup> [4] | 687 <sup>k</sup> [4] | 20 | 0 | 9.4  | 2.40E-09 | 1.10E+01 |
| 608 | Ac | 3 | 1.12  | 1    | 73.2 <sup>k</sup> [4] | 687 <sup>k</sup> [4] | 20 | 0 | 10.1 | 2.20E-09 | 1.30E+02 |
| 609 | Ac | 3 | 1.12  | 1    | 73.2 <sup>k</sup> [4] | 687 <sup>k</sup> [4] | 20 | 0 | 9.4  | 2.40E-09 | 1.60E+02 |
| 610 | Ac | 3 | 1.12  | 1    | 73.2 <sup>k</sup> [4] | 687 <sup>k</sup> [4] | 20 | 0 | 9.4  | 2.40E-09 | 2.10E+00 |
| 611 | Ac | 3 | 1.12  | 1    | 73.2 <sup>k</sup> [4] | 687 <sup>k</sup> [4] | 20 | 0 | 9.4  | 2.40E-09 | 3.10E+01 |
| 612 | Ac | 3 | 1.12  | 1    | 73.2 <sup>k</sup> [4] | 687 <sup>k</sup> [4] | 20 | 0 | 10.1 | 2.20E-09 | 3.40E+01 |
| 613 | Ac | 3 | 1.12  | 1    | 73.2 <sup>k</sup> [4] | 687 <sup>k</sup> [4] | 20 | 0 | 9.4  | 2.40E-09 | 5.00E+01 |
| 614 | Ac | 3 | 1.12  | 1    | 73.2 <sup>k</sup> [4] | 687 <sup>k</sup> [4] | 20 | 0 | 10.1 | 2.20E-09 | 5.40E+01 |
| 615 | Ac | 3 | 1.12  | 1    | 73.2 <sup>k</sup> [4] | 687 <sup>k</sup> [4] | 20 | 0 | 10.1 | 2.20E-09 | 5.80E+01 |
| 616 | Ac | 3 | 1.12  | 1    | 73.2 <sup>k</sup> [4] | 687 <sup>k</sup> [4] | 20 | 0 | 10.1 | 2.20E-09 | 5.90E+01 |
| 617 | Ac | 3 | 1.12  | 1    | 73.2 <sup>k</sup> [4] | 687 <sup>k</sup> [4] | 20 | 0 | 9.4  | 2.40E-09 | 9.30E+01 |
| 618 | Ac | 3 | 1.12  | 1    | 73.2 <sup>k</sup> [4] | 687 <sup>k</sup> [4] | 20 | 0 | 10.1 | 2.20E-09 | 9.40E+01 |
| 619 | Cm | 3 | 0.97  | 1.2  | 73.2 <sup>k</sup> [4] | 687 <sup>k</sup> [4] | 20 | 0 | 9.4  | 1.70E-10 | 2.20E+01 |
| 620 | Cm | 3 | 0.97  | 1.2  | 73.2 <sup>k</sup> [4] | 687 <sup>k</sup> [4] | 20 | 0 | 10.1 | 1.70E-10 | 2.30E+00 |
| 621 | Cm | 3 | 0.97  | 1.2  | 73.2 <sup>k</sup> [4] | 687 <sup>k</sup> [4] | 20 | 0 | 10.1 | 1.70E-10 | 2.90E+01 |
| 622 | Cm | 3 | 0.97  | 1.2  | 73.2 <sup>k</sup> [4] | 687 <sup>k</sup> [4] | 20 | 0 | 9.4  | 1.70E-10 | 3.30E+01 |
| 623 | Pa | 4 | 0.9   | 1.14 | 73.2 <sup>k</sup> [4] | 687 <sup>k</sup> [4] | 20 | 0 | 10.1 | 1.30E-11 | 1.90E+02 |
| 624 | Pa | 4 | 0.9   | 1.14 | 73.2 <sup>k</sup> [4] | 687 <sup>k</sup> [4] | 20 | 0 | 10.1 | 1.30E-11 | 1.90E+02 |
| 625 | Pa | 4 | 0.9   | 1.14 | 73.2 <sup>k</sup> [4] | 687 <sup>k</sup> [4] | 20 | 0 | 10.1 | 1.30E-11 | 2.10E+02 |
| 626 | Pa | 4 | 0.9   | 1.14 | 73.2 <sup>k</sup> [4] | 687 <sup>k</sup> [4] | 20 | 0 | 10.1 | 1.30E-11 | 2.60E+02 |
| 627 | Pa | 4 | 0.9   | 1.14 | 73.2 <sup>k</sup> [4] | 687 <sup>k</sup> [4] | 20 | 0 | 10.1 | 1.30E-11 | 2.60E+02 |

|     |    |   |       |      |                       |                      |       |      |      |          |          |
|-----|----|---|-------|------|-----------------------|----------------------|-------|------|------|----------|----------|
| 628 | Pa | 4 | 0.9   | 1.14 | 73.2 <sup>k</sup> [4] | 687 <sup>k</sup> [4] | 20    | 0    | 9.4  | 1.30E-11 | 2.90E+02 |
| 629 | Pa | 4 | 0.9   | 1.14 | 73.2 <sup>k</sup> [4] | 687 <sup>k</sup> [4] | 20    | 0    | 9.4  | 1.30E-11 | 3.20E+02 |
| 630 | Pa | 4 | 0.9   | 1.14 | 73.2 <sup>k</sup> [4] | 687 <sup>k</sup> [4] | 20    | 0    | 9.4  | 1.30E-11 | 3.30E+02 |
| 631 | Pa | 4 | 0.9   | 1.14 | 73.2 <sup>k</sup> [4] | 687 <sup>k</sup> [4] | 20    | 0    | 10.1 | 1.30E-11 | 3.50E+02 |
| 632 | Pa | 4 | 0.9   | 1.14 | 73.2 <sup>k</sup> [4] | 687 <sup>k</sup> [4] | 20    | 0    | 9.4  | 1.30E-11 | 7.60E+00 |
| 633 | Pa | 4 | 0.9   | 1.14 | 73.2 <sup>k</sup> [4] | 687 <sup>k</sup> [4] | 20    | 0    | 9.4  | 1.30E-11 | 8.10E+00 |
| 634 | Pa | 4 | 0.9   | 1.14 | 73.2 <sup>k</sup> [4] | 687 <sup>k</sup> [4] | 20    | 0    | 9.4  | 1.30E-11 | 9.90E+00 |
| 635 | Am | 3 | 0.975 | 1.2  | 73.2 <sup>k</sup> [4] | 687 <sup>k</sup> [4] | 58.22 | 0    | 8.2  | 1.00E-09 | 1.00E+01 |
| 636 | Am | 3 | 0.975 | 1.2  | 73.2 <sup>k</sup> [4] | 687 <sup>k</sup> [4] | 109.5 | 0    | 8.2  | 1.00E-09 | 1.00E+01 |
| 637 | Am | 3 | 0.975 | 1.2  | 73.2 <sup>k</sup> [4] | 687 <sup>k</sup> [4] | 20    | 0    | 8.2  | 1.00E-09 | 1.01E+01 |
| 638 | Am | 3 | 0.975 | 1.2  | 73.2 <sup>k</sup> [4] | 687 <sup>k</sup> [4] | 58.22 | 0    | 8.2  | 1.00E-09 | 1.32E+00 |
| 639 | Am | 3 | 0.975 | 1.2  | 73.2 <sup>k</sup> [4] | 687 <sup>k</sup> [4] | 20    | 0    | 8.2  | 1.00E-09 | 1.67E+00 |
| 640 | Am | 3 | 0.975 | 1.2  | 73.2 <sup>k</sup> [4] | 687 <sup>k</sup> [4] | 109.5 | 0    | 8.2  | 1.00E-09 | 2.12E+00 |
| 641 | Am | 3 | 0.975 | 1.2  | 73.2 <sup>k</sup> [4] | 687 <sup>k</sup> [4] | 58.22 | 0    | 8.2  | 1.00E-09 | 4.48E+00 |
| 642 | Am | 3 | 0.975 | 1.2  | 73.2 <sup>k</sup> [4] | 687 <sup>k</sup> [4] | 20    | 0    | 8.2  | 1.00E-09 | 6.20E-01 |
| 643 | Am | 3 | 0.975 | 1.2  | 73.2 <sup>k</sup> [4] | 687 <sup>k</sup> [4] | 109.5 | 0    | 8.2  | 1.00E-09 | 7.52E+00 |
| 644 | Sn | 4 | 0.69  | 1.72 | 73.2 <sup>k</sup> [4] | 687 <sup>k</sup> [4] | 10000 | 0.01 | 10.9 | 1.10E-06 | 6.80E+00 |
| 645 | Sn | 4 | 0.69  | 1.72 | 73.2 <sup>k</sup> [4] | 687 <sup>k</sup> [4] | 10000 | 0.01 | 11   | 1.10E-06 | 7.30E+00 |
| 646 | Sn | 4 | 0.69  | 1.72 | 73.2 <sup>k</sup> [4] | 687 <sup>k</sup> [4] | 9550  | 0.01 | 8.9  | 7.00E-09 | 1.10E+02 |
| 647 | Sn | 4 | 0.69  | 1.72 | 73.2 <sup>k</sup> [4] | 687 <sup>k</sup> [4] | 9550  | 0.01 | 8.8  | 7.00E-09 | 1.82E+02 |
| 648 | Sn | 4 | 0.69  | 1.72 | 73.2 <sup>k</sup> [4] | 687 <sup>k</sup> [4] | 9550  | 0.01 | 10.8 | 7.00E-09 | 2.50E+01 |
| 649 | Sn | 4 | 0.69  | 1.72 | 73.2 <sup>k</sup> [4] | 687 <sup>k</sup> [4] | 9550  | 0.01 | 5.4  | 7.00E-09 | 2.90E+02 |
| 650 | Sn | 4 | 0.69  | 1.72 | 73.2 <sup>k</sup> [4] | 687 <sup>k</sup> [4] | 9550  | 0.01 | 10.8 | 7.00E-09 | 3.00E+01 |
| 651 | Sn | 4 | 0.69  | 1.72 | 73.2 <sup>k</sup> [4] | 687 <sup>k</sup> [4] | 9550  | 0.01 | 5.3  | 7.00E-09 | 4.00E+02 |
| 652 | Sn | 4 | 0.69  | 1.72 | 73.2 <sup>k</sup> [4] | 687 <sup>k</sup> [4] | 9550  | 0.01 | 9    | 7.00E-09 | 5.60E+02 |
| 653 | Sn | 4 | 0.69  | 1.72 | 73.2 <sup>k</sup> [4] | 687 <sup>k</sup> [4] | 9950  | 0.1  | 8.7  | 9.00E-09 | 1.00E+03 |
| 654 | Sn | 4 | 0.69  | 1.72 | 73.2 <sup>k</sup> [4] | 687 <sup>k</sup> [4] | 9950  | 0.1  | 5.8  | 9.00E-09 | 1.10E+03 |
| 655 | Sn | 4 | 0.69  | 1.72 | 73.2 <sup>k</sup> [4] | 687 <sup>k</sup> [4] | 9950  | 0.1  | 11.2 | 9.00E-09 | 1.30E+01 |
| 656 | Sn | 4 | 0.69  | 1.72 | 73.2 <sup>k</sup> [4] | 687 <sup>k</sup> [4] | 9950  | 0.1  | 9.2  | 9.00E-09 | 1.30E+02 |
| 657 | Sn | 4 | 0.69  | 1.72 | 73.2 <sup>k</sup> [4] | 687 <sup>k</sup> [4] | 9950  | 0.1  | 5.9  | 9.00E-09 | 6.60E+02 |
| 658 | Sn | 4 | 0.69  | 1.72 | 73.2 <sup>k</sup> [4] | 687 <sup>k</sup> [4] | 9950  | 0.1  | 11   | 9.00E-09 | 6.70E+00 |
| 659 | Np | 5 | 0.75  | 1.22 | 73.2 <sup>k</sup> [4] | 687 <sup>k</sup> [4] | 10    | 0.01 | 3    | 1.05E-06 | 1.21E-03 |
| 660 | Np | 5 | 0.75  | 1.22 | 73.2 <sup>k</sup> [4] | 687 <sup>k</sup> [4] | 10    | 0.01 | 6    | 1.05E-06 | 1.35E-03 |
| 661 | Np | 5 | 0.75  | 1.22 | 73.2 <sup>k</sup> [4] | 687 <sup>k</sup> [4] | 100   | 0.01 | 2.7  | 1.05E-06 | 1.66E-04 |
| 662 | Np | 5 | 0.75  | 1.22 | 73.2 <sup>k</sup> [4] | 687 <sup>k</sup> [4] | 100   | 0.01 | 8    | 1.05E-06 | 1.70E-01 |
| 663 | Np | 5 | 0.75  | 1.22 | 73.2 <sup>k</sup> [4] | 687 <sup>k</sup> [4] | 100   | 0.01 | 8.2  | 1.05E-06 | 1.70E-01 |
| 664 | Np | 5 | 0.75  | 1.22 | 73.2 <sup>k</sup> [4] | 687 <sup>k</sup> [4] | 10    | 0.01 | 8.2  | 1.05E-06 | 1.85E-02 |
| 665 | Np | 5 | 0.75  | 1.22 | 73.2 <sup>k</sup> [4] | 687 <sup>k</sup> [4] | 10    | 0.01 | 8    | 1.05E-06 | 2.04E-02 |
| 666 | Np | 5 | 0.75  | 1.22 | 73.2 <sup>k</sup> [4] | 687 <sup>k</sup> [4] | 100   | 0.01 | 10.8 | 1.05E-06 | 2.88E-01 |
| 667 | Np | 5 | 0.75  | 1.22 | 73.2 <sup>k</sup> [4] | 687 <sup>k</sup> [4] | 10    | 0.01 | 10.4 | 1.05E-06 | 3.18E-01 |
| 668 | Np | 5 | 0.75  | 1.22 | 73.2 <sup>k</sup> [4] | 687 <sup>k</sup> [4] | 100   | 0.01 | 9.2  | 1.05E-06 | 3.23E-01 |
| 669 | Np | 5 | 0.75  | 1.22 | 73.2 <sup>k</sup> [4] | 687 <sup>k</sup> [4] | 10    | 0.01 | 6.5  | 1.05E-06 | 3.41E-02 |
| 670 | Np | 5 | 0.75  | 1.22 | 73.2 <sup>k</sup> [4] | 687 <sup>k</sup> [4] | 100   | 0.01 | 10.9 | 1.05E-06 | 3.57E-01 |
| 671 | Np | 5 | 0.75  | 1.22 | 73.2 <sup>k</sup> [4] | 687 <sup>k</sup> [4] | 10    | 0.01 | 9.4  | 1.05E-06 | 3.65E-01 |
| 672 | Np | 5 | 0.75  | 1.22 | 73.2 <sup>k</sup> [4] | 687 <sup>k</sup> [4] | 100   | 0.01 | 8.5  | 1.05E-06 | 3.78E-02 |



|     |    |   |       |      |                       |                      |     |                         |       |          |          |
|-----|----|---|-------|------|-----------------------|----------------------|-----|-------------------------|-------|----------|----------|
| 673 | Np | 5 | 0.75  | 1.22 | 73.2 <sup>k</sup> [4] | 687 <sup>k</sup> [4] | 10  | 0.01                    | 4.7   | 1.05E-06 | 3.78E-03 |
| 674 | Np | 5 | 0.75  | 1.22 | 73.2 <sup>k</sup> [4] | 687 <sup>k</sup> [4] | 10  | 0.01                    | 8.5   | 1.05E-06 | 3.81E-02 |
| 675 | Np | 5 | 0.75  | 1.22 | 73.2 <sup>k</sup> [4] | 687 <sup>k</sup> [4] | 100 | 0.01                    | 3.3   | 1.05E-06 | 3.90E-03 |
| 676 | Np | 5 | 0.75  | 1.22 | 73.2 <sup>k</sup> [4] | 687 <sup>k</sup> [4] | 10  | 0.01                    | 3.2   | 1.05E-06 | 4.03E-03 |
| 677 | Np | 5 | 0.75  | 1.22 | 73.2 <sup>k</sup> [4] | 687 <sup>k</sup> [4] | 10  | 0.01                    | 8.5   | 1.05E-06 | 4.55E-02 |
| 678 | Np | 5 | 0.75  | 1.22 | 73.2 <sup>k</sup> [4] | 687 <sup>k</sup> [4] | 10  | 0.01                    | 11.5  | 1.05E-06 | 5.22E+00 |
| 679 | Np | 5 | 0.75  | 1.22 | 73.2 <sup>k</sup> [4] | 687 <sup>k</sup> [4] | 10  | 0.01                    | 7.8   | 1.05E-06 | 5.85E-02 |
| 680 | Np | 5 | 0.75  | 1.22 | 73.2 <sup>k</sup> [4] | 687 <sup>k</sup> [4] | 10  | 0.01                    | 2.8   | 1.05E-06 | 6.00E-04 |
| 681 | Np | 5 | 0.75  | 1.22 | 73.2 <sup>k</sup> [4] | 687 <sup>k</sup> [4] | 100 | 0.01                    | 11.8  | 1.05E-06 | 6.51E+00 |
| 682 | Np | 5 | 0.75  | 1.22 | 73.2 <sup>k</sup> [4] | 687 <sup>k</sup> [4] | 100 | 0.01                    | 9.6   | 1.05E-06 | 6.79E-01 |
| 683 | Am | 3 | 0.975 | 1.2  | 73.2 <sup>k</sup> [4] | 687 <sup>k</sup> [4] | 500 | 0                       | 7.6   | 1.00E-09 | 1.01E+02 |
| 684 | Am | 3 | 0.975 | 1.2  | 73.2 <sup>k</sup> [4] | 687 <sup>k</sup> [4] | 500 | 0                       | 8.85  | 1.00E-09 | 1.14E+01 |
| 685 | Am | 3 | 0.975 | 1.2  | 73.2 <sup>k</sup> [4] | 687 <sup>k</sup> [4] | 500 | 0                       | 7.55  | 1.00E-09 | 1.28E+02 |
| 686 | Am | 3 | 0.975 | 1.2  | 73.2 <sup>k</sup> [4] | 687 <sup>k</sup> [4] | 500 | 0                       | 8.85  | 1.00E-09 | 1.37E+01 |
| 687 | Am | 3 | 0.975 | 1.2  | 73.2 <sup>k</sup> [4] | 687 <sup>k</sup> [4] | 500 | 0                       | 7.9   | 1.00E-09 | 2.15E+01 |
| 688 | Am | 3 | 0.975 | 1.2  | 73.2 <sup>k</sup> [4] | 687 <sup>k</sup> [4] | 500 | 0                       | 6.65  | 1.00E-09 | 3.52E+01 |
| 689 | Am | 3 | 0.975 | 1.2  | 73.2 <sup>k</sup> [4] | 687 <sup>k</sup> [4] | 500 | 0                       | 5.2   | 1.00E-09 | 3.74E+01 |
| 690 | Am | 3 | 0.975 | 1.2  | 73.2 <sup>k</sup> [4] | 687 <sup>k</sup> [4] | 500 | 0                       | 8.25  | 1.00E-09 | 3.82E+01 |
| 691 | Am | 3 | 0.975 | 1.2  | 73.2 <sup>k</sup> [4] | 687 <sup>k</sup> [4] | 500 | 0                       | 7.05  | 1.00E-09 | 4.87E+01 |
| 692 | Am | 3 | 0.975 | 1.2  | 73.2 <sup>k</sup> [4] | 687 <sup>k</sup> [4] | 500 | 0                       | 5.85  | 1.00E-09 | 5.57E+01 |
| 693 | Am | 3 | 0.975 | 1.2  | 73.2 <sup>k</sup> [4] | 687 <sup>k</sup> [4] | 500 | 0                       | 8.6   | 1.00E-09 | 7.92E+00 |
| 694 | Am | 3 | 0.975 | 1.2  | 73.2 <sup>k</sup> [4] | 687 <sup>k</sup> [4] | 500 | 0                       | 7.2   | 1.00E-09 | 9.43E+01 |
| 695 | Cs | 1 | 1.67  | 0.86 | 73.2 <sup>k</sup> [4] | 687 <sup>k</sup> [4] | 500 | 0                       | 8.68  | 7.52E-05 | 1.35E+00 |
| 696 | Cs | 1 | 1.67  | 0.86 | 73.2 <sup>k</sup> [4] | 687 <sup>k</sup> [4] | 500 | 0                       | 9.72  | 7.52E-05 | 1.50E+00 |
| 697 | Cs | 1 | 1.67  | 0.86 | 73.2 <sup>k</sup> [4] | 687 <sup>k</sup> [4] | 500 | 0                       | 10.51 | 7.52E-05 | 2.28E+00 |
| 698 | Cs | 1 | 1.67  | 0.86 | 73.2 <sup>k</sup> [4] | 687 <sup>k</sup> [4] | 500 | 0                       | 2.81  | 7.52E-05 | 2.46E-01 |
| 699 | Cs | 1 | 1.67  | 0.86 | 73.2 <sup>k</sup> [4] | 687 <sup>k</sup> [4] | 500 | 0                       | 2.53  | 7.52E-05 | 2.69E-01 |
| 700 | Cs | 1 | 1.67  | 0.86 | 73.2 <sup>k</sup> [4] | 687 <sup>k</sup> [4] | 500 | 0                       | 4.19  | 7.52E-05 | 5.42E-01 |
| 701 | Cs | 1 | 1.67  | 0.86 | 73.2 <sup>k</sup> [4] | 687 <sup>k</sup> [4] | 500 | 0                       | 5.57  | 7.52E-05 | 6.97E-01 |
| 702 | Cs | 1 | 1.67  | 0.86 | 73.2 <sup>k</sup> [4] | 687 <sup>k</sup> [4] | 500 | 0                       | 6.92  | 7.52E-05 | 8.51E-01 |
| 703 | Th | 4 | 0.94  | 1.11 | 73.2 <sup>k</sup> [4] | 687 <sup>k</sup> [4] | 100 | 0.1                     | 8.57  | 1.00E-06 | 1.30E+01 |
| 704 | Th | 4 | 0.94  | 1.11 | 73.2 <sup>k</sup> [4] | 687 <sup>k</sup> [4] | 100 | 0.1                     | 8.63  | 1.00E-06 | 1.30E+01 |
| 705 | Th | 4 | 0.94  | 1.11 | 73.2 <sup>k</sup> [4] | 687 <sup>k</sup> [4] | 100 | 0.1                     | 8.63  | 1.00E-06 | 1.40E+01 |
| 706 | Th | 4 | 0.94  | 1.11 | 73.2 <sup>k</sup> [4] | 687 <sup>k</sup> [4] | 100 | 0.1                     | 8.57  | 1.00E-06 | 1.70E+01 |
| 707 | Th | 4 | 0.94  | 1.11 | 73.2 <sup>k</sup> [4] | 687 <sup>k</sup> [4] | 100 | 0                       | 9.67  | 8.00E-10 | 7.70E-02 |
| 708 | Th | 4 | 0.94  | 1.11 | 73.2 <sup>k</sup> [4] | 687 <sup>k</sup> [4] | 100 | 0                       | 10    | 8.00E-10 | 7.90E-02 |
| 709 | Th | 4 | 0.94  | 1.11 | 73.2 <sup>k</sup> [4] | 687 <sup>k</sup> [4] | 100 | 0                       | 10    | 8.00E-10 | 1.20E-02 |
| 710 | Th | 4 | 0.94  | 1.11 | 73.2 <sup>k</sup> [4] | 687 <sup>k</sup> [4] | 100 | 0.715 <sup>n</sup> [9]  | 7.9   | 4.00E-09 | 8.20E-01 |
| 711 | Th | 4 | 0.94  | 1.11 | 73.2 <sup>k</sup> [4] | 687 <sup>k</sup> [4] | 100 | 0.715 <sup>n</sup> [9]  | 7.9   | 4.00E-09 | 8.20E-01 |
| 712 | Th | 4 | 0.94  | 1.11 | 73.2 <sup>k</sup> [4] | 687 <sup>k</sup> [4] | 100 | 0.715 <sup>n</sup> [9]  | 7.97  | 4.00E-09 | 8.20E-01 |
| 713 | Th | 4 | 0.94  | 1.11 | 73.2 <sup>k</sup> [4] | 687 <sup>k</sup> [4] | 100 | 0.715 <sup>n</sup> [9]  | 7.97  | 4.00E-09 | 8.20E-01 |
| 714 | Co | 2 | 0.745 | 1.7  | 73.2 <sup>k</sup> [4] | 687 <sup>k</sup> [4] | 50  | 0.007 <sup>o</sup> [10] | 1.5   | 1.00E-02 | 3.00E-04 |
| 715 | Co | 2 | 0.745 | 1.7  | 73.2 <sup>k</sup> [4] | 687 <sup>k</sup> [4] | 50  | 0.007 <sup>o</sup> [10] | 7.3   | 1.00E-02 | 1.30E-03 |
| 716 | Co | 2 | 0.745 | 1.7  | 73.2 <sup>k</sup> [4] | 687 <sup>k</sup> [4] | 50  | 0.007 <sup>o</sup> [10] | 7.3   | 1.00E-02 | 2.90E-03 |
| 717 | Co | 2 | 0.745 | 1.7  | 73.2 <sup>k</sup> [4] | 687 <sup>k</sup> [4] | 50  | 0.007 <sup>o</sup> [10] | 1.6   | 1.00E-02 | 4.40E-03 |

|     |    |    |       |      |                       |                      |     |                         |       |          |          |
|-----|----|----|-------|------|-----------------------|----------------------|-----|-------------------------|-------|----------|----------|
| 718 | Co | 2  | 0.745 | 1.7  | 73.2 <sup>k</sup> [4] | 687 <sup>k</sup> [4] | 50  | 0.007 <sup>o</sup> [10] | 2.9   | 1.02E-03 | 6.30E-03 |
| 719 | Co | 2  | 0.745 | 1.7  | 73.2 <sup>k</sup> [4] | 687 <sup>k</sup> [4] | 50  | 0.007 <sup>o</sup> [10] | 7.8   | 9.33E-06 | 3.50E-01 |
| 720 | Co | 2  | 0.745 | 1.7  | 73.2 <sup>k</sup> [4] | 687 <sup>k</sup> [4] | 50  | 0.007 <sup>o</sup> [10] | 7.1   | 1.02E-04 | 4.30E-01 |
| 721 | Cs | 1  | 1.67  | 0.86 | 73.2 <sup>k</sup> [4] | 687 <sup>k</sup> [4] | 50  | 0.007 <sup>o</sup> [10] | 7.3   | 7.71E-03 | 7.50E-03 |
| 722 | Cs | 1  | 1.67  | 0.86 | 73.2 <sup>k</sup> [4] | 687 <sup>k</sup> [4] | 50  | 0.007 <sup>o</sup> [10] | 7.3   | 7.71E-03 | 7.80E-03 |
| 723 | Cs | 1  | 1.67  | 0.86 | 73.2 <sup>k</sup> [4] | 687 <sup>k</sup> [4] | 50  | 0.007 <sup>o</sup> [10] | 1.5   | 7.71E-03 | 9.90E-03 |
| 724 | Cs | 1  | 1.67  | 0.86 | 73.2 <sup>k</sup> [4] | 687 <sup>k</sup> [4] | 50  | 0.007 <sup>o</sup> [10] | 2.9   | 8.13E-04 | 3.70E-02 |
| 725 | Cs | 1  | 1.67  | 0.86 | 73.2 <sup>k</sup> [4] | 687 <sup>k</sup> [4] | 50  | 0.007 <sup>o</sup> [10] | 1.6   | 7.71E-03 | 4.40E-02 |
| 726 | Cs | 1  | 1.67  | 0.86 | 73.2 <sup>k</sup> [4] | 687 <sup>k</sup> [4] | 50  | 0.007 <sup>o</sup> [10] | 7.8   | 8.35E-06 | 8.90E-02 |
| 727 | Cs | 1  | 1.67  | 0.86 | 73.2 <sup>k</sup> [4] | 687 <sup>k</sup> [4] | 50  | 0.007 <sup>o</sup> [10] | 7.1   | 8.05E-05 | 4.50E-01 |
| 728 | I  | -1 | 2.2   | 2.21 | 73.2 <sup>k</sup> [4] | 687 <sup>k</sup> [4] | 5   | 0.007 <sup>o</sup> [10] | 7.9   | 9.46E-03 | 8.00E-05 |
| 729 | Sr | 2  | 1.18  | 0.99 | 73.2 <sup>k</sup> [4] | 687 <sup>k</sup> [4] | 50  | 0.007 <sup>o</sup> [10] | 7.3   | 1.18E-02 | 1.90E-03 |
| 730 | Sr | 2  | 1.18  | 0.99 | 73.2 <sup>k</sup> [4] | 687 <sup>k</sup> [4] | 50  | 0.007 <sup>o</sup> [10] | 1.5   | 1.18E-02 | 2.20E-03 |
| 731 | Sr | 2  | 1.18  | 0.99 | 73.2 <sup>k</sup> [4] | 687 <sup>k</sup> [4] | 50  | 0.007 <sup>o</sup> [10] | 7.3   | 1.18E-02 | 2.40E-03 |
| 732 | Sr | 2  | 1.18  | 0.99 | 73.2 <sup>k</sup> [4] | 687 <sup>k</sup> [4] | 50  | 0.007 <sup>o</sup> [10] | 1.6   | 1.18E-02 | 6.80E-03 |
| 733 | Sr | 2  | 1.18  | 0.99 | 73.2 <sup>k</sup> [4] | 687 <sup>k</sup> [4] | 50  | 0.007 <sup>o</sup> [10] | 2.9   | 1.16E-03 | 8.00E-03 |
| 734 | Sr | 2  | 1.18  | 0.99 | 73.2 <sup>k</sup> [4] | 687 <sup>k</sup> [4] | 50  | 0.007 <sup>o</sup> [10] | 7.8   | 1.27E-05 | 3.00E-01 |
| 735 | Sr | 2  | 1.18  | 0.99 | 73.2 <sup>k</sup> [4] | 687 <sup>k</sup> [4] | 50  | 0.007 <sup>o</sup> [10] | 7.1   | 1.18E-04 | 3.80E-01 |
| 736 | Po | 4  | 0.94  | 1.76 | 73.2 <sup>k</sup> [4] | 687 <sup>k</sup> [4] | 20  | 0                       | 10.1  | 1.10E-11 | 2.70E+01 |
| 737 | Po | 4  | 0.94  | 1.76 | 73.2 <sup>k</sup> [4] | 687 <sup>k</sup> [4] | 20  | 0                       | 10.1  | 1.10E-11 | 3.20E+01 |
| 738 | Po | 4  | 0.94  | 1.76 | 73.2 <sup>k</sup> [4] | 687 <sup>k</sup> [4] | 20  | 0                       | 10.1  | 1.10E-11 | 5.50E+01 |
| 739 | Po | 4  | 0.94  | 1.76 | 73.2 <sup>k</sup> [4] | 687 <sup>k</sup> [4] | 20  | 0                       | 10.1  | 1.10E-11 | 7.50E+01 |
| 740 | Po | 4  | 0.94  | 1.76 | 73.2 <sup>k</sup> [4] | 687 <sup>k</sup> [4] | 20  | 0                       | 10.1  | 1.10E-11 | 8.20E+01 |
| 741 | Po | 4  | 0.94  | 1.76 | 73.2 <sup>k</sup> [4] | 687 <sup>k</sup> [4] | 20  | 0                       | 10.1  | 1.10E-11 | 8.50E+01 |
| 742 | Pu | 4  | 0.86  | 1.22 | 73.2 <sup>k</sup> [4] | 687 <sup>k</sup> [4] | 20  | 0                       | 9.4   | 4.30E-11 | 1.30E+01 |
| 743 | Pu | 4  | 0.86  | 1.22 | 73.2 <sup>k</sup> [4] | 687 <sup>k</sup> [4] | 20  | 0                       | 9.4   | 4.30E-11 | 1.60E+01 |
| 744 | Pu | 4  | 0.86  | 1.22 | 73.2 <sup>k</sup> [4] | 687 <sup>k</sup> [4] | 20  | 0                       | 9.4   | 4.30E-11 | 1.10E+01 |
| 745 | Pu | 4  | 0.86  | 1.22 | 73.2 <sup>k</sup> [4] | 687 <sup>k</sup> [4] | 20  | 0                       | 9.4   | 4.30E-11 | 2.10E+01 |
| 746 | Pu | 4  | 0.86  | 1.22 | 73.2 <sup>k</sup> [4] | 687 <sup>k</sup> [4] | 20  | 0                       | 9.4   | 4.30E-11 | 8.70E+01 |
| 747 | Pu | 4  | 0.86  | 1.22 | 73.2 <sup>k</sup> [4] | 687 <sup>k</sup> [4] | 20  | 0                       | 9.4   | 4.30E-11 | 2.70E+01 |
| 748 | Am | 3  | 0.975 | 1.2  | 73.2 <sup>k</sup> [4] | 687 <sup>k</sup> [4] | 20  | 0                       | 9.4   | 1.20E-10 | 1.20E+01 |
| 749 | Am | 3  | 0.975 | 1.2  | 73.2 <sup>k</sup> [4] | 687 <sup>k</sup> [4] | 20  | 0                       | 9.4   | 1.20E-10 | 3.00E+01 |
| 750 | Am | 3  | 0.975 | 1.2  | 73.2 <sup>k</sup> [4] | 687 <sup>k</sup> [4] | 20  | 0                       | 9.4   | 1.20E-10 | 1.00E+02 |
| 751 | Am | 3  | 0.975 | 1.2  | 73.2 <sup>k</sup> [4] | 687 <sup>k</sup> [4] | 20  | 0                       | 9.4   | 1.20E-10 | 4.60E+01 |
| 752 | Am | 3  | 0.975 | 1.2  | 73.2 <sup>k</sup> [4] | 687 <sup>k</sup> [4] | 20  | 0                       | 9.4   | 1.20E-10 | 1.10E+02 |
| 753 | Am | 3  | 0.975 | 1.2  | 73.2 <sup>k</sup> [4] | 687 <sup>k</sup> [4] | 20  | 0                       | 9.4   | 1.20E-10 | 3.00E+01 |
| 754 | Ni | 2  | 0.69  | 1.75 | 73.2 <sup>k</sup> [4] | 687 <sup>k</sup> [4] | 100 | 0.1                     | 7.63  | 1.00E-04 | 1.15E+00 |
| 755 | Ni | 2  | 0.69  | 1.75 | 73.2 <sup>k</sup> [4] | 687 <sup>k</sup> [4] | 100 | 0.001                   | 10.94 | 1.00E-06 | 1.56E+00 |
| 756 | Ni | 2  | 0.69  | 1.75 | 73.2 <sup>k</sup> [4] | 687 <sup>k</sup> [4] | 100 | 0.001                   | 4.66  | 1.00E-04 | 2.71E-01 |
| 757 | Ni | 2  | 0.69  | 1.75 | 73.2 <sup>k</sup> [4] | 687 <sup>k</sup> [4] | 100 | 0.1                     | 4.91  | 1.00E-04 | 2.78E-02 |
| 758 | Ni | 2  | 0.69  | 1.75 | 73.2 <sup>k</sup> [4] | 687 <sup>k</sup> [4] | 100 | 0.1                     | 10.78 | 1.00E-06 | 2.90E+00 |
| 759 | Ni | 2  | 0.69  | 1.75 | 73.2 <sup>k</sup> [4] | 687 <sup>k</sup> [4] | 100 | 0.1                     | 10.83 | 1.00E-06 | 2.90E+00 |
| 760 | Ni | 2  | 0.69  | 1.75 | 73.2 <sup>k</sup> [4] | 687 <sup>k</sup> [4] | 100 | 0.001                   | 7.34  | 1.00E-04 | 3.17E+00 |
| 761 | Ni | 2  | 0.69  | 1.75 | 73.2 <sup>k</sup> [4] | 687 <sup>k</sup> [4] | 100 | 0.001                   | 7.47  | 1.00E-04 | 3.17E+00 |
| 762 | Ni | 2  | 0.69  | 1.75 | 73.2 <sup>k</sup> [4] | 687 <sup>k</sup> [4] | 100 | 0.001                   | 10.96 | 1.00E-06 | 3.56E+00 |

|     |    |   |      |      |                        |                       |     |                         |      |          |          |
|-----|----|---|------|------|------------------------|-----------------------|-----|-------------------------|------|----------|----------|
| 763 | Ni | 2 | 0.69 | 1.75 | 73.2 <sup>k)</sup> [4] | 687 <sup>k)</sup> [4] | 100 | 0.001                   | 5.05 | 1.00E-04 | 3.71E-01 |
| 764 | Ni | 2 | 0.69 | 1.75 | 73.2 <sup>k)</sup> [4] | 687 <sup>k)</sup> [4] | 100 | 0.1                     | 5.1  | 1.00E-04 | 7.00E-02 |
| 765 | Ni | 2 | 0.69 | 1.75 | 73.2 <sup>k)</sup> [4] | 687 <sup>k)</sup> [4] | 100 | 0.1                     | 7.64 | 1.00E-04 | 7.73E-01 |
| 766 | Nb | 5 | 0.64 | 1.23 | 73.2 <sup>k)</sup> [4] | 687 <sup>k)</sup> [4] | 50  | 0                       | 7.7  | 1.40E-07 | 1.15E+00 |
| 767 | Nb | 5 | 0.64 | 1.23 | 73.2 <sup>k)</sup> [4] | 687 <sup>k)</sup> [4] | 50  | 0.715 <sup>n)</sup> [9] | 7.1  | 2.20E-07 | 1.20E+00 |
| 768 | Nb | 5 | 0.64 | 1.23 | 73.2 <sup>k)</sup> [4] | 687 <sup>k)</sup> [4] | 50  | 0                       | 7.8  | 1.40E-07 | 1.38E+00 |
| 769 | Nb | 5 | 0.64 | 1.23 | 73.2 <sup>k)</sup> [4] | 687 <sup>k)</sup> [4] | 50  | 0                       | 8.2  | 1.40E-07 | 1.44E+00 |
| 770 | Nb | 5 | 0.64 | 1.23 | 73.2 <sup>k)</sup> [4] | 687 <sup>k)</sup> [4] | 50  | 0.715 <sup>n)</sup> [9] | 7.4  | 2.20E-07 | 1.84E+00 |
| 771 | Nb | 5 | 0.64 | 1.23 | 73.2 <sup>k)</sup> [4] | 687 <sup>k)</sup> [4] | 50  | 0.715 <sup>n)</sup> [9] | 7.5  | 2.20E-07 | 6.38E+00 |
| 772 | Zr | 4 | 0.72 | 1.22 | 73.2 <sup>k)</sup> [4] | 687 <sup>k)</sup> [4] | 50  | 0                       | 7.7  | 9.20E-08 | 1.30E+00 |
| 773 | Zr | 4 | 0.72 | 1.22 | 73.2 <sup>k)</sup> [4] | 687 <sup>k)</sup> [4] | 50  | 0.715 <sup>n)</sup> [9] | 7.4  | 1.50E-07 | 1.55E+00 |
| 774 | Zr | 4 | 0.72 | 1.22 | 73.2 <sup>k)</sup> [4] | 687 <sup>k)</sup> [4] | 50  | 0                       | 7.8  | 9.20E-08 | 2.77E+00 |
| 775 | Zr | 4 | 0.72 | 1.22 | 73.2 <sup>k)</sup> [4] | 687 <sup>k)</sup> [4] | 50  | 0                       | 8.2  | 9.20E-08 | 6.91E+00 |
| 776 | Zr | 4 | 0.72 | 1.22 | 73.2 <sup>k)</sup> [4] | 687 <sup>k)</sup> [4] | 50  | 0.715 <sup>n)</sup> [9] | 7.5  | 1.50E-07 | 8.28E+00 |
| 777 | Zr | 4 | 0.72 | 1.22 | 73.2 <sup>k)</sup> [4] | 687 <sup>k)</sup> [4] | 50  | 0.715 <sup>n)</sup> [9] | 7.1  | 1.50E-07 | 9.50E-01 |

a) Oxidation number; b) Ionic radius; c) Electronegativity; d) Cation exchange capacity; e) Surface area; f) Solid-liquid ratio; g) Ionic strength; h) Initial radionuclide concentration; i) represented as 'MX-80' in JAEA-SDB; j) represented as 'SWy-2' in JAEA-SDB; k) represented as 'Kunigel V1' in JAEA-SDB; l) represented as 'synthetic groundwater' in JAEA-SDB; m) represented as 'synthetic porewater' in JAEA-SDB; n) represented as 'seawater' in JAEA-SDB; o) represented as 'tap water' in JAEA-SDB

## References

- [1] Sugiura Y.; Suyama T.; Tachi, Y. *Development of JAEA sorption database (JAEA-SDB): Update of sorption/QA Data in FY2019*; Japan Atomic Energy Agency: Ibaraki, Japan, 2020, doi:10.11484/jaea-data-code-2019-022.
- [2] Shannon, R.D. Revised effective ionic radii and systematic studies of interatomic distances in halides and chalcogenides. *Acta crystallographica section A: crystal physics, diffraction, theoretical and general crystallography* **1976**, 32, 751-767.
- [3] Little Jr, E.J.; Jones, M.M. A complete table of electronegativities. *Journal of chemical education* **1960**, 37, 231-233.
- [4] Chen, T.; Sedighi, M.; Jivkov, A.; Seetharam, S. A model for hydraulic conductivity of compacted bentonite–inclusion of microstructure effects under confined wetting. *Géotechnique* **2020**, 71, 1-14.
- [5] Physical and Chemical Data of Source Clays. Available online: [https://www.clays.org/sourceclays\\_data/](https://www.clays.org/sourceclays_data/) (accessed on 01 May 2022)
- [6] Torstenfelt, B.; Andersson, K.; Allard, B. *Sorption of Sr and Cs on Rocks and Minerals*; National Council for Radioactive Waste: Stockholm, Sweden, 1981.
- [7] Torstenfelt, B.; Kipatsi, K.; Andersson, K.; Allard, B.; Olofsson, U. Transport of actinides through a bentonite backfill. In *Scientific Basis for Nuclear Waste Management-V*; Lutze, W.; Elsevier, New York, 1982, pp. 659-668.
- [8] Kitamura, A.; Tomura, T.; Sato, H.; Nakayama, M. *Sorption behavior of cesium onto bentonite and sedimentary rocks in saline groundwaters*; Japan Atomic Energy Agency: Ibaraki, Japan, 2008.
- [9] Millero, F. J.; Feistel, R.; Wright, D.G.; McDougall, T.J. The composition of Standard Seawater and the definition of the Reference-Composition Salinity Scale. *Deep Sea Research Part I: Oceanographic Research Papers* **2008**, 55, 50-72.
- [10] Mateus, M.V.; Araújo, L.S.; Leopoldino, A.B.; Ferreira, M.S.; Ferreira D.C.; Lus, M.S.L.; Gonçalves\*, J.C.S.I. Molecular interactions and modeling of anionic surfactant effect on oxygen transfer in a cylindrical reactor. In *Environmental Engineering Science*; Mary Ann Liebert, Inc.: New York, USA, 2019; Volume 36, pp. 180-185.
